# Supplementary material
Source: PubMed Central journal article supplement (PMC3624287)
Supplement: JVI.03146-12_zjv999097548so1.pdf [file JVI.03146-12_zjv999097548so1.pdf]

**SUPPORTING INFORMATION FOR:**

**Antibody Conjugation Approach Enhances Breadth and Potency of  
Neutralization of anti-HIV-1 Antibodies and CD4-IgG**

**running title: Potent, Broadly Active Bispecific anti-HIV Antibodies**

Julia Gavriluk,<sup>1</sup> Hitoshi Ban,<sup>1,2</sup> Hisatoshi Uehara,<sup>1,3</sup> Shannon Sirk,<sup>1</sup> Karen Saye,<sup>4</sup>  
Angelica Cuevas,<sup>4</sup> Elise Zablowsky,<sup>5</sup> Avinash Oza,<sup>5</sup> Michael S. Seaman,<sup>5</sup> Dennis  
R. Burton,<sup>4</sup> and Carlos F. Barbas, III\*<sup>1</sup>

*<sup>1</sup>Departments of Chemistry and Molecular Biology and the Skaggs Institute for  
Chemical Biology, The Scripps Research Institute, La Jolla, California, USA;*

*<sup>2</sup>Dainippon Sumitomo Pharma, Osaka, Japan; <sup>3</sup>Mitsubishi Chemical Group  
Science and Technology Research Center, Yokohama, Japan; <sup>4</sup>Department of  
Immunology and Microbial Science and IAVI Neutralizing Antibody Center and  
Center for HIV/AIDS Vaccine Immunology and Immunogen Discovery, The  
Scripps Research Institute, La Jolla, California, USA; <sup>5</sup>Beth Israel Deaconess  
Medical Center, Harvard Medical School, Boston, Massachusetts, USA*

**Corresponding Author:** Carlos F. Barbas, III Departments of Chemistry and  
Molecular Biology and the Skaggs Institute for Chemical Biology, The Scripps  
Research Institute, La Jolla, CA 92037, [carlos@scripps.edu](mailto:carlos@scripps.edu)

**Table of contents.**

**1. MALDI-TOF characterization of antibody conjugates. .... 3**

**2. Tryptic digest and MS/MS characterization of antibody conjugates. .... 9**

**3. Optimization studies for the modification of model antibody (Trastuzumab)..... 11**

**4. Additional Neutralization Experiments..... 16**

**5. Neutralization Results for 117 Pseudovirus Panel Screen..... 17**

**6. PG9 and PG9-aplaviroc MPI full summary..... 32**

# 1. MALDI-TOF characterization of antibody conjugates.

Trastuzumab-aplaviroc:

$M_{av}$  (trastuzumab) = 148348

$M_{av}$  (trastuzumab-apl) = 149243

## MALDI-TOF REFLECTRON

Original Filename: d:\data\routine\2011\june\060811\2181s.ms  
This File # 2 : D:\DATA\ROUTINE\2011\JUNE\060811\SM2181.MS  
Comment:

Method: BSAK                      Laser: 2300  
Mode: Linear                      Scans Averaged: 204  
Accelerating Voltage: 25000      Pressure: 2.12e-07  
Grid Voltage: 94.000 %          Low Mass Gate: 4000.0  
Guide Wire Voltage: 0.300 %      Timed Ion Selector: 26.9 OFF  
Delay: 50 ON                      Negative Ions: OFF  
Sample: 66                          Collected: 6/9/11 3:56 AM  
Savitsky-Golay Order = 2 Points = 19

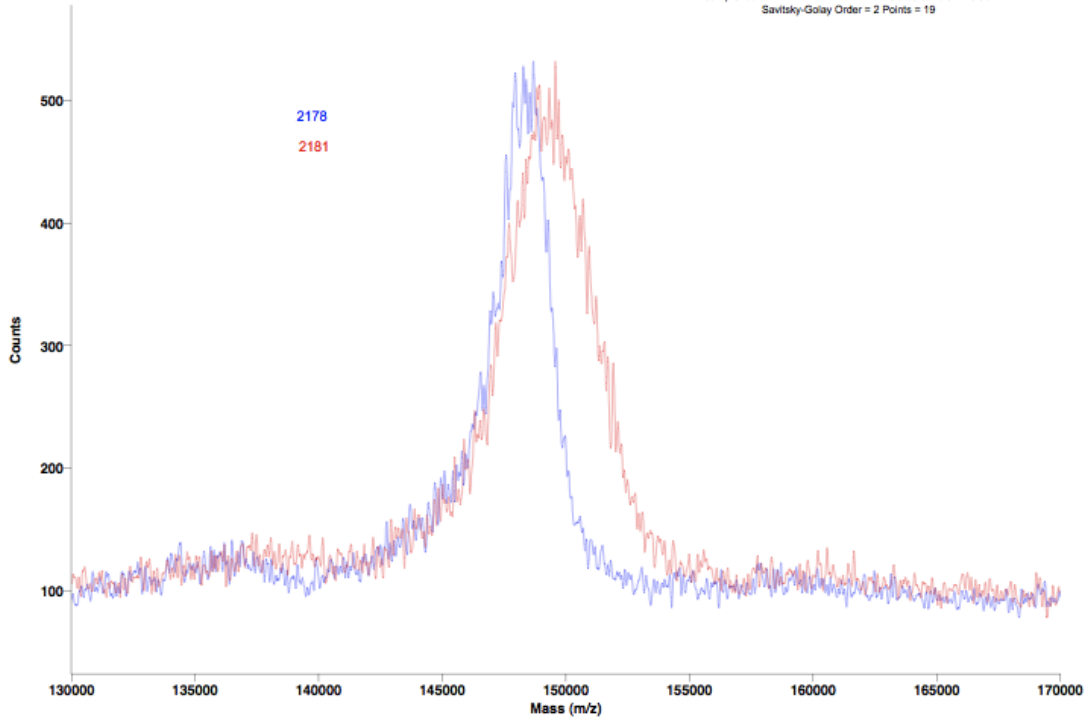

IgG b12-aplaviroc:

$M_{av} (b12) = 151960$

$M_{av} (b12-apl) = 152347$

### MALDI-TOF REFLECTRON

Original Filename: d:\data\routine\2011\june\060811\2186s2.ms  
This File # 2 : D:\DATA\ROUTINE\2011\JUNE\060811\ISM2186B.MS  
Comment:

Method: BSAK  
Mode: Linear  
Accelerating Voltage: 25000  
Grid Voltage: 94.000 %  
Guide Wire Voltage: 0.300 %  
Delay: 50 ON  
Sample: 70  
Laser: 2400  
Scans Averaged: 198  
Pressure: 1.30e-07  
Low Mass Gate: 4000.0  
Timed Ion Selector: 26.9 OFF  
Negative Ions: OFF  
Collected: 6/8/11 4:05 AM  
Savitsky-Golay Order = 2 Points = 19

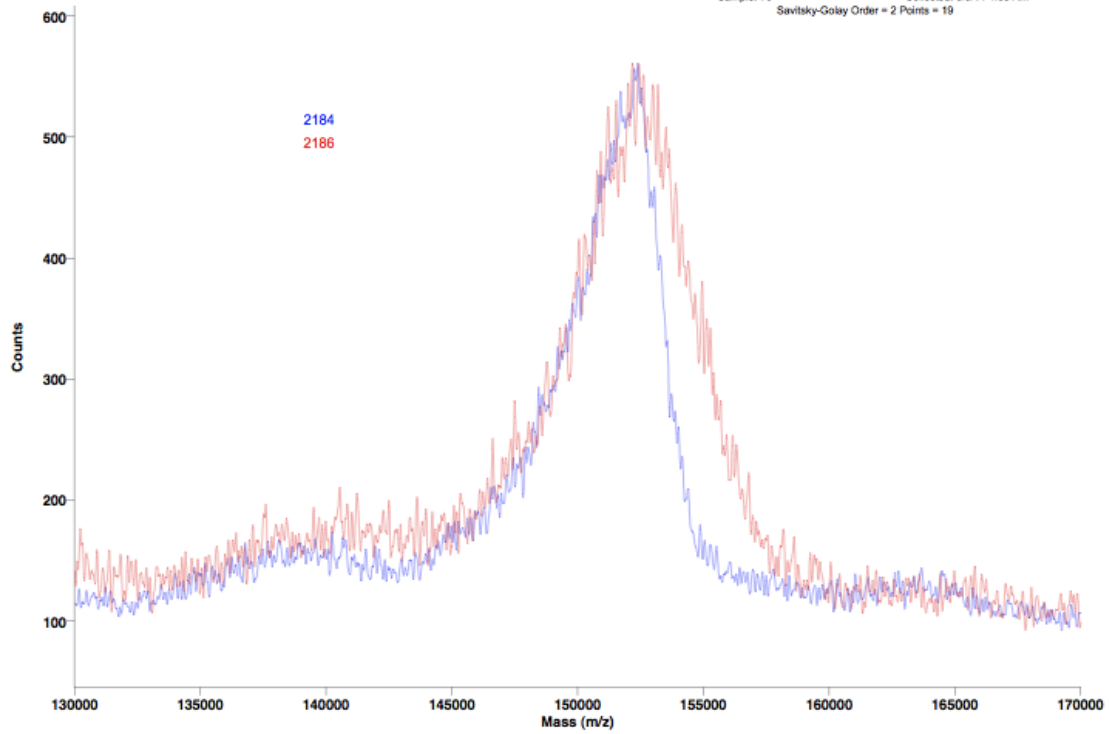

IgG 2G12-aplaviroc:  
 $M_{av}$  (2G12) = 149397  
 $M_{av}$  (2G12-apl) = 151464

### MALDI-TOF REFLECTRON

Original Filename: d:\data\routine\2011\June\060811\2189s.ms  
This File # 2 : D:\DATA\ROUTINE\2011\JUNE\060811\SM2189.MS  
Comment:

Method: BSAK  
Mode: Linear  
Accelerating Voltage: 25000  
Grid Voltage: 94.000 %  
Guide Wire Voltage: 0.300 %  
Delay: 50 ON  
Sample: 75  
Laser: 2400  
Scans Averaged: 215  
Pressure: 1.09e-07  
Low Mass Gate: 4000.0  
Timed Ion Selector: 26.9 OFF  
Negative Ions: OFF  
Collected: 6/9/11 4:09 AM

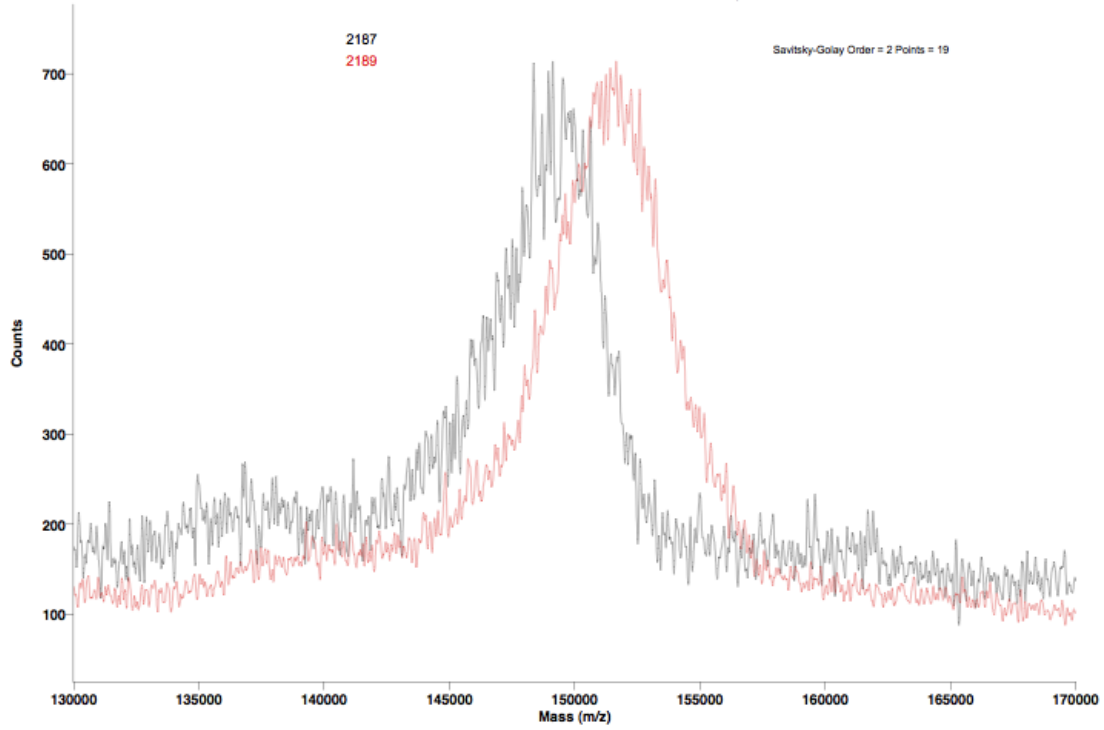

IgG PG9-aplaviroc:

$M_{av}$  (PG) = 155168

$M_{av}$  (PG9-apl) = 156408

### MALDI-TOF REFLECTRON

Original Filename: d:\data\routine\2011\june\060811\2192s6.ms  
This File # 2 : D:\DATA\ROUTINE\2011\JUNE\060811\SM2192.MS  
Comment:

Method: BSAK  
Mode: Linear  
Accelerating Voltage: 25000  
Grid Voltage: 94.000 %  
Guide Wire Voltage: 0.300 %  
Delay: 50 ON  
Sample: 79  
Laser: 2500  
Scans Averaged: 189  
Pressure: 1.95e-07  
Low Mass Gate: 4000.0  
Timed Ion Selector: 26.9 OFF  
Negative Ions: OFF  
Collected: 6/9/11 7:43 AM

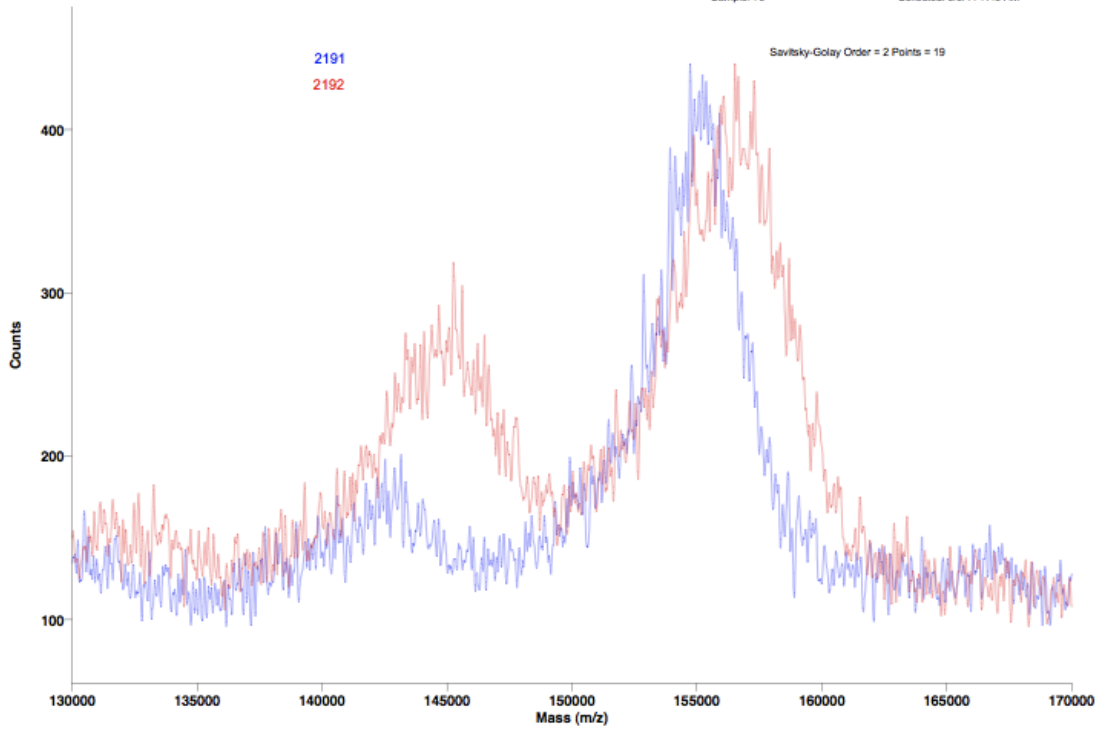

IgG PG16-aplaviroc:  
 $M_{av}$  (PG16) = 154644  
 $M_{av}$  (PG16-apl) = 157377

### MALDI-TOF REFLECTRON

Original Filename: d:\data\routine\2011\june\060811\2195.ms  
This File # 2 : D:\DATA\ROUTINE\2011\JUNE\060811\SM2195.MS  
Comment:

Method: BSAK  
Mode: Linear  
Accelerating Voltage: 25000  
Grid Voltage: 94.000 %  
Guide Wire Voltage: 0.300 %  
Delay: 50 ON  
Sample: 90  
Laser: 2800  
Scans Averaged: 256  
Pressure: 9.75e-08  
Low Mass Gate: 4000.0  
Timed Ion Selector: 26.9 OFF  
Negative Ions: OFF  
Collected: 6/9/11 7:58 AM

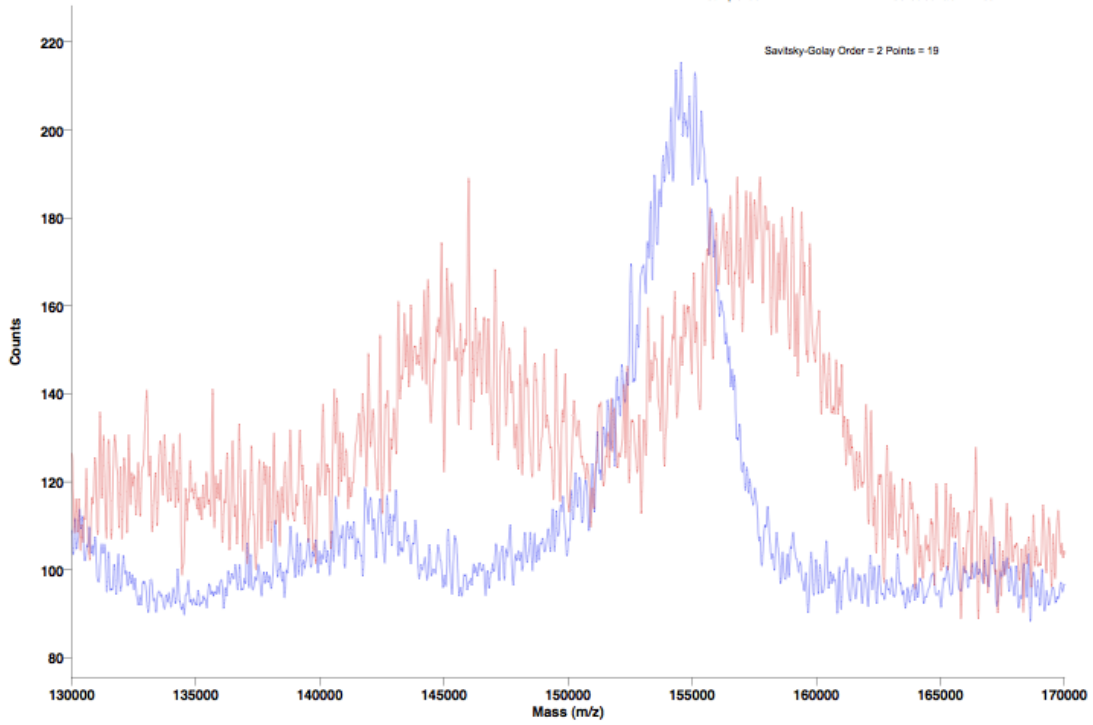

CD4-IgG-aplaviroc:

$M_{av}$  (CD4-IgG) = 177125

$M_{av}$  (CD4-IgG-apl) = 178900

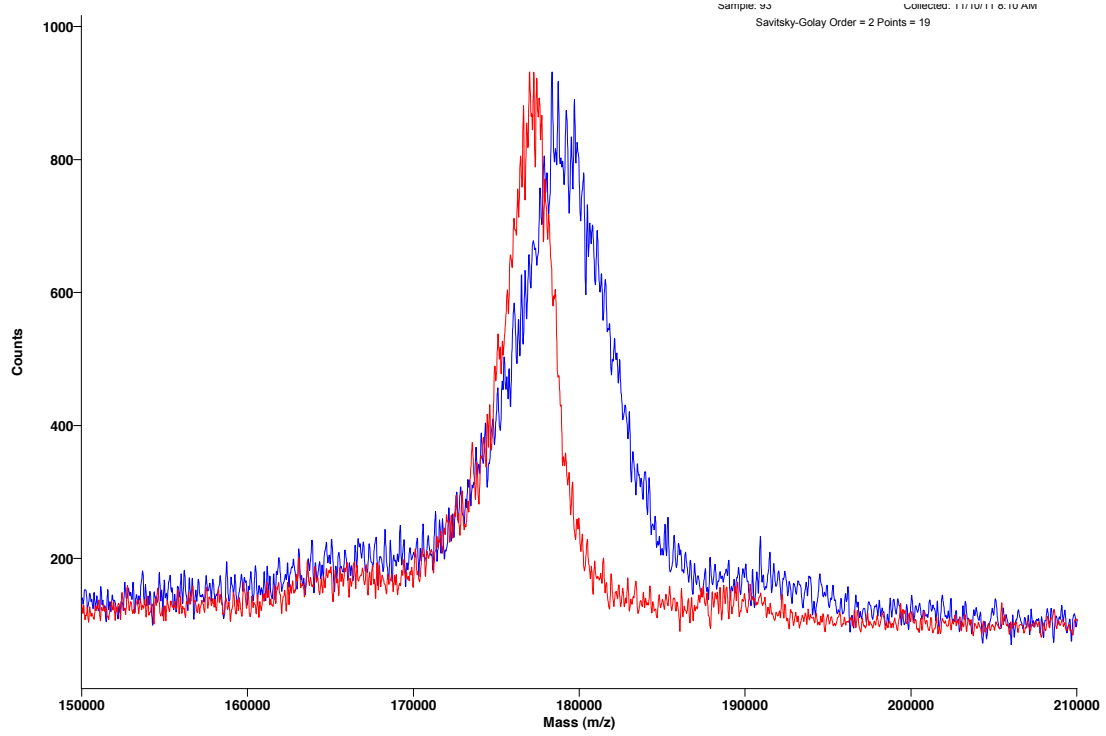



## **2. Tryptic digest and MS/MS characterization of antibody conjugates.**

### **Tryptic digest procedure.**

Purified antibody samples (100  $\mu$ l, 1 mg/ml) were exchanged into 6 M guanidine, 0.1 M Tris, pH 8.0 using 0.5-ml Zeba spin desalting columns (7k MWCC) as per the manufacturer's instructions. To each sample, 1 M DTT (Fisher) was added to a final concentration of 20 mM. The samples were incubated for one hour at 37°C with gentle shaking, and a 1 M solution of iodoacetamide (Fisher) was added to each sample to a final concentration of 40 mM. Samples were incubated at room temperature in the dark for 40 min. The alkylation reactions were quenched by adding 1 M DTT to a 40 mM final concentration. Sample buffer was then exchanged to trypsin digestion buffer (50 mM Tris, pH 7.5, 5 mM  $\text{CaCl}_2$ ) using 0.5-ml Zeba spin desalting columns (7k MWCC). Trypsin Gold (0.5 mg/ml, Pierce) was dissolved in 50 mM acetic acid. Trypsin solution was added to each sample at a 1:20 ratio (enzyme:protein, weight/weight), and samples were incubated at 37°C with shaking at 600 rpm for approximately 18 hours. Digestion was stopped by addition of TFA to approximately 0.1%.

Samples (20  $\mu$ g protein injected) were analyzed using an Agilent 6510 Q-TOF mass spectrometer with Zorbax SB-C18 narrow-bore, 2.1x150 mm, 3.5- $\mu$ m column (Agilent). HPLC parameters were as follows: flow rate 0.2 ml/min, gradient from 0 to 40% mobile phase B over 80 min followed by a gradient to 0% B from 80 to 90 min. Mobile phase A was 0.05% TFA (v/v) in HPLC-grade  $\text{H}_2\text{O}$ , 2% acetonitrile (v/v), and mobile phase B was 0.04% TFA (v/v) in 90% acetonitrile (v/v). MS data was collected for 200-2500 m/z and 100-2000m/z, positive polarity, gas temperature 325 °C, nebulizer 30 psi, capillary voltage 3500 V. Data was analyzed using MassHunter Software (Agilent) and GPMW Version 8.20 Software (ChemSW).

### **Analysis summary.**

Analysis was done using published antibody sequences.

Non-modified antibody samples were also digested and analyzed as controls (data not shown).

MassHunter Bioconfirm workflow was used with the following specifications: “Find by molecular feature” was run with the Isotope Model “Unbiased” and limiting charged state to a maximum of 5. Allowed ion species included positive ions +H, +Na; negative ions –H; neutral loss H<sub>2</sub>O. Other parameters were left at default values.

Aplaviroc-FBDP modification was added to the chemical modifications library and systematically applied to sequence and searched for the target modified peptide fragments. All cysteine residues were modified with iodoacetamide.

Structures of the found aplaviroc-modified fragments were confirmed by MSMS fragmentation pattern, reference MSMS fragmentation ions was calculated using GPMW.

**Table1.** Summary of the identified modification positions.

| Antibody    | # Samples tested | Identified Fragment Sequence | Peptide fragment Expected Mass:MH+, M2H+, M3H+ | Found Mass     | Position modified  | Average Signal Intensity |
|-------------|------------------|------------------------------|------------------------------------------------|----------------|--------------------|--------------------------|
| Trastuzumab | 4                | NTAYLQMNLSLR                 | 2405.232, 1203.120, 802.416                    | 1203.1, 802.4  | Y80 (heavy chain)  | 1.20E+03                 |
| Trastuzumab | 4                | EEQYNSTYR                    | 2284.092, 1142.550, 762.036                    | 1142.55, 762.0 | Y300 (heavy chain) | 5.30E+04                 |
| b12         | 2                | VSCQASGYR                    | 2064.013, 1032.510, 688.676                    | 1032.5, 688.7  | Y27 (heavy chain)  | 3.10E+03                 |
| b12         | 2                | EEQYNSTYR                    | 2284.092, 1142.550, 762.036                    | 1142.6, 762.0  | Y306 (heavy chain) | 6.01E+04                 |
| 2g12        | 2                | EEQYNSTYR                    | 2284.092, 1142.550, 762.036                    | 1142.6, 762.0  | Y404(heavy chain)  | 4.70E+04                 |
| 2g12        | 2                | WQQGNVFCSCVMHEALHNHYTC       | 3864.841, 1932.924, 1288.952                   | 1289           | Y544(heavy chain)  | 1.80E+04                 |
| 2g12        | 2                | SGTASVVCLLNNFYPR             | 2861.469, 1431.238, 954.495                    | 1431.2, 954.5  | Y139 (light chain) | 8.20E+02                 |
| PG9         | 2                | EEQYNSTYR                    | 2284.092, 1142.550, 762.036                    | 1142.55, 762.0 | Y314(heavy chain)  | 3.40E+04                 |
| PG9         | 2                | SGTASVVCLLNNFYPR             | 2861.469, 1431.238, 954.495                    | 1431.2, 954.5  | Y143(light chain)  | 9.50E+02                 |
| PG16        | 2                | YHSDSMWGR                    | 2233.054, 1117.030, 745.023                    | 1117.03, 745.0 | Y59(heavy chain)   | 2.50E+02                 |
| PG16        | 2                | EEQYNSTYR                    | 2284.092, 1142.550, 762.036                    | 1142.55, 762.0 | Y413(heavy chain)  | 3.10E+03                 |
| PG16        | 2                | EYK                          | 1533.799, 767.403, 511.938                     | 1533.8, 767.4  | Y436(heavy chain)  | 1.20E+02                 |

### 3. Optimization studies for the modification of model antibody (Trastuzumab).

Optimization study was performed with trastuzumab as model IgG in order to identify optimal procedure for antibody modification, assess reproducibility and protein recovery.

Method A: two steps

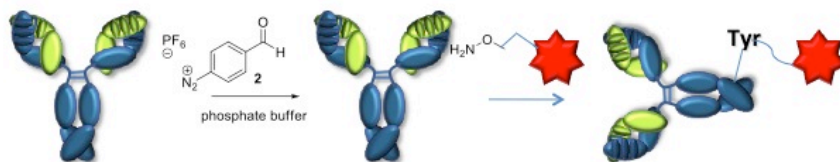

Method B: one step

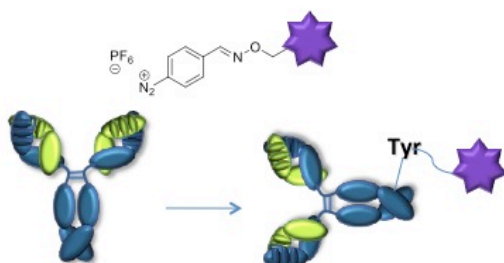

#### General protocol for the two-step procedure.

*Step 1:* To the 200  $\mu\text{L}$  of trastuzumab solution (1.5 mg/ml, 0.1M  $\text{Na}_2\text{HPO}_4$  solution pH 8.0) was added FBDP solution in  $\text{CH}_3\text{CN}$  (2  $\mu\text{L}$  of 20 mM solution). Reaction mixture was vortexed gently and allowed to react for 30 min. Reaction turned yellow. The reaction was run through the gel filtration spin column to remove excess FBDP and exchange buffer to 0.1M phosphate buffer pH 6.0. Results summarized in Table 2.

*Step 2:* To the solution of FBDP modified antibody from step 1 were added 4  $\mu\text{L}$  of 20 mM solution of aplaviroc-oxyamine, reaction was vortexed and allowed to react at 4°C for 18h. The resulting conjugate was purified using gel filtration spin column, 20  $\mu\text{L}$  stacker used. Results summarized in Table 3.

Protein concentration in the resulting solution was determined using two independent methods. One method based on the absorbance at 280 nm (Nanodrop) with the correction for the absorbance of diazene product at 340 nm, correction factor of 0.436. Trastuzumab extinction coefficient was calculated using trastuzumab sequence and ExPasy ProtParam tool (<http://web.expasy.org/cgi-bin/protparam/protparam>). Another was based on the

Bradford test for protein concentration, using unmodified trastuzumab solution of known concentration as standard.

**Table 2.** Summary of the first step experiments in two-step antibody modification procedure.

| #  | Her conc., $\mu\text{M}$ | FBDP eq | Precipitation observed | Column for gel filtration | Recovery, % | Comments                            |
|----|--------------------------|---------|------------------------|---------------------------|-------------|-------------------------------------|
| 1  | 6.7                      | 10      | No                     | Bio-Rad                   | 69          | Phosphate buffer pH 7.4             |
| 2  | 6.7                      | 10      | No                     | Bio-Rad                   | 66          | Phosphate buffer pH 8.0             |
| 3  | 6.7                      | 10      | No                     | Bio-Rad                   | 69          | Phosphate buffer pH 7.4 + 0.1M urea |
| 4  | 100                      | 10      | No                     | Bio-Rad                   | 98          | Phosphate buffer pH 8.0             |
| 5  | 10                       | 10      | No                     | Bio-Rad                   | 13          | Phosphate buffer pH 8.0             |
| 6  | 10                       | 10      | No                     | Bio-Rad                   | 35          | Phosphate buffer pH 8.0             |
| 7  | 10                       | 10      | No                     | Zeba                      | 65          | Phosphate buffer pH 8.0             |
| 8  | 10                       | 10      | No                     | Zeba                      | 60          | Phosphate buffer pH 8.0             |
| 9  | 17                       | 10      | No                     | Zeba                      | 99          | Phosphate buffer pH 8.0             |
| 10 | 10                       | 10      | No                     | Bio-Rad                   | 83          | Phosphate buffer pH 8.0             |
| 11 | 10                       | 10      | No                     | Zeba                      | 99          | Phosphate buffer pH 8.0             |
| 12 | 10                       | 10      | No                     | Bio-Rad                   | 77          | Phosphate buffer pH 8.0             |
| 13 | 10                       | 10      | No                     | Zeba                      | 99          | Phosphate buffer pH 8.0             |
| 14 | 10                       | 10      | No                     | Bio-Rad                   | 84          | Phosphate buffer pH 8.0             |
| 15 | 10                       | 10      | No                     | Zeba                      | 99          | Phosphate buffer pH 8.0             |

**Table 3.** Summary of the second step experiments in two-step antibody modification procedure.

| # | Aplaviroc-ONH <sub>2</sub> eq. | Column for gel filtration | Recovery, % | Average # of modifications/Ab | Comments |
|---|--------------------------------|---------------------------|-------------|-------------------------------|----------|
| 1 | 29                             | Bio-Rad                   | 50          | 0.96                          | o/n, 4°C |
| 2 | 29                             | Bio-Rad                   | 54          | 0.69                          | o/n, 4°C |
| 3 | 29                             | Bio-Rad                   | 56          | 0.85                          | o/n, 4°C |
| 4 | 20                             | Bio-Rad                   | 99          | 1.56                          | o/n, 4°C |

|    |    |         |    |      |          |
|----|----|---------|----|------|----------|
| 5  | 20 | Bio-Rad | 40 | -    | o/n, 4°C |
| 6  | 20 | Bio-Rad | 30 | -    | o/n, 4°C |
| 7  | 20 | Zeba    | 87 | 2.25 | o/n, 4°C |
| 8  | 20 | Zeba    | 73 | 2.5  | o/n, 4°C |
| 9  | 10 | Zeba    | 99 | 2.13 | o/n, 4°C |
| 10 | 20 | Bio-Rad | 58 | 1.54 | o/n, 4°C |
| 11 | 20 | Zeba    | 71 | 2.07 | o/n, 4°C |
| 12 | 20 | Bio-Rad | 62 | -    | o/n, 4°C |
| 13 | 20 | Zeba    | 71 | -    | o/n, 4C  |
| 14 | 20 | Bio-Rad | 57 | -    | o/n, 4C  |
| 15 | 20 | Zeba    | 71 | 2.03 | o/n, 4C  |

### General protocol for the one-step antibody modification procedure.

In 150  $\mu$ L eppendorf tube were combined 1.6  $\mu$ L of 100 mM acid solution in CH<sub>3</sub>CN and 4  $\mu$ L of 20 mM aplaviroc-oxyamine followed by 4  $\mu$ L of 20 mM FBDP in CH<sub>3</sub>CN and mixed, allowed to preform the oxime at rt for **30** min. Then, 200  $\mu$ L of trastuzumab solution (1.5 mg/ml, 0.1M Na<sub>2</sub>HPO<sub>4</sub> buffer pH 8.0) were added, vortexed gently and allowed to react for 30 min at rt. Reaction mixture turned yellow. Reaction mixture was run through the gel filtration spin column to remove excess of the reagents, 10  $\mu$ L stacker used. Results summarized in Tables 4 and 5.

Protein concentration in the resulting solution was determined using two independent methods. One method based on the absorbance at 280 nm (Nanodrop) with the correction for the absorbance of diazene product at 340 nm, correction factor of 0.436. Trastuzumab extinction coefficient was calculated using trastuzumab sequence and ExPasy ProtParam tool (<http://web.expasy.org/cgi-bin/protparam/protparam>). Another was based on the Bradford test for protein concentration, using unmodified trastuzumab solution of known concentration as standard.

**Table 4.** Summary of the optimization experiments in one-step antibody modification procedure at pH 8.0.

| #  | Acid Additive | Column for gel filtration | Recovery, % | # modifications/Ab | Precipitation observed |
|----|---------------|---------------------------|-------------|--------------------|------------------------|
| 1  | -             | Bio-Rad                   | 64          | 0.36               | no                     |
| 2  | AcOH          | Bio-Rad                   | 68          | 0.3                | no                     |
| 3  | HCl           | Bio-Rad                   | 65          | 0                  | no                     |
| 4  | TFA           | Zeba                      | 97          | 0.47               | yes                    |
| 5  | TFA           | Zeba                      | 99          | 0.28               | yes                    |
| 6  | TFA           | Zeba                      | 45          | 0.39               | yes                    |
| 7  | HCl           | Zeba                      | 99          | 0.51               | yes                    |
| 8  | AcOH          | Zeba                      | 99          | 0.21               | yes                    |
| 9  | TFA           | Zeba                      | 95          | 0.52               | yes                    |
| 10 | HCl           | Zeba                      | 99          | 0.41               | yes                    |
| 11 | AcOH          | Zeba                      | 99          | 0.14               | yes                    |
| 12 | TFA           | Zeba                      | 99          | 0.31               | yes                    |

**Table 5.** Summary of the optimization experiments in one-step antibody modification procedure at pH 9.0.

| # | Acid additive                          | Column for gel filtration | % recovery | # modifications/Ab |
|---|----------------------------------------|---------------------------|------------|--------------------|
| 1 | TFA                                    | Zeba                      | 82         | 0.44               |
| 2 | H <sub>2</sub> SO <sub>4</sub> (aq)    | Zeba                      | 99         | -                  |
| 3 | H <sub>3</sub> PO <sub>4</sub> (conc). | Zeba                      | 95         | 0.46               |
| 4 | TFA                                    | Zeba                      | 91         | 0.56               |
| 5 | HCl                                    | Zeba                      | 99         | 1.95               |
| 6 | H <sub>2</sub> SO <sub>4</sub>         | Zeba                      | 86         | 0.39               |
| 7 | H <sub>3</sub> PO <sub>4</sub>         | Zeba                      | 99         | 1                  |

|    |                                |         |    |      |
|----|--------------------------------|---------|----|------|
| 8  | HCl                            | Bio-Rad | 71 | 0.7  |
| 9  | H <sub>3</sub> PO <sub>4</sub> | Bio-Rad | 75 | 0.9  |
| 10 | HCl                            | Bio-Rad | 75 | 0    |
| 11 | H <sub>3</sub> PO <sub>4</sub> | Bio-Rad | 57 | 0.2  |
| 12 | HCl                            | Bio-Rad | 71 | 0.6  |
| 13 | H <sub>3</sub> PO <sub>4</sub> | Bio-Rad | 75 | 1    |
| 14 | HCl                            | Zeba    | 76 | 0.3  |
| 15 | H <sub>3</sub> PO <sub>4</sub> | Zeba    | 99 | 1    |
| 16 | HCl                            | Zeba    | 99 | 0.4  |
| 17 | HCl                            | Zeba    | 97 | 0.82 |
| 18 | H <sub>3</sub> PO <sub>4</sub> | Zeba    | 87 | 1.54 |
| 19 | H <sub>3</sub> PO <sub>4</sub> | Zeba    | 86 | 0.84 |

#### 4. Additional Neutralization Experiments.

Neutralization of the CCR5-tropic HIV-1 JR-FL and YU2 by 1:1 molar mixture PG9 and Aplaviroc.

##### Neutralization of HIV-1 JR-FL Pseudovirus

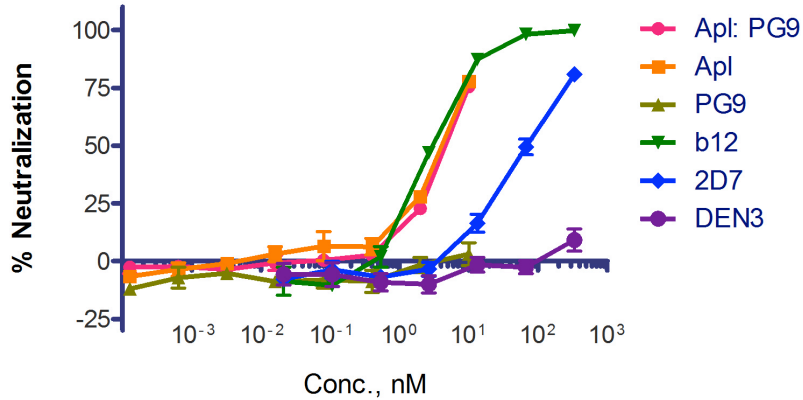

##### Neutralization of HIV-1 YU2 Pseudovirus

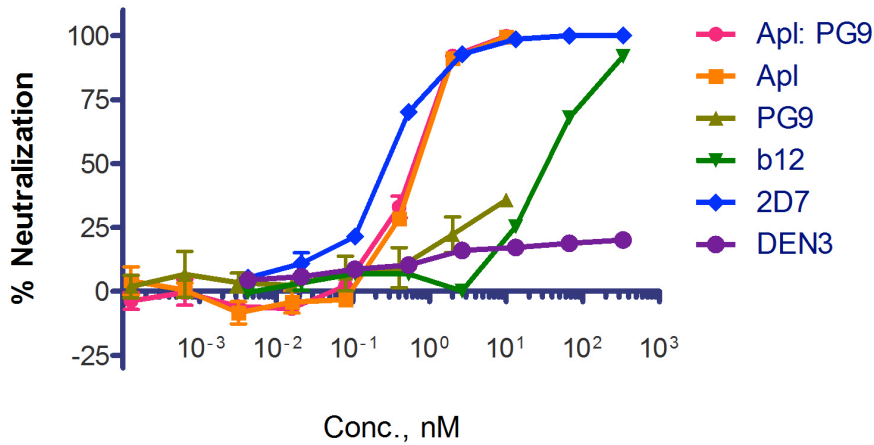

Neutralization of the CXCR4-tropic HIV-1 HXB2 virus.

##### Neutralization of HIV-1 HXB2 Pseudovirus

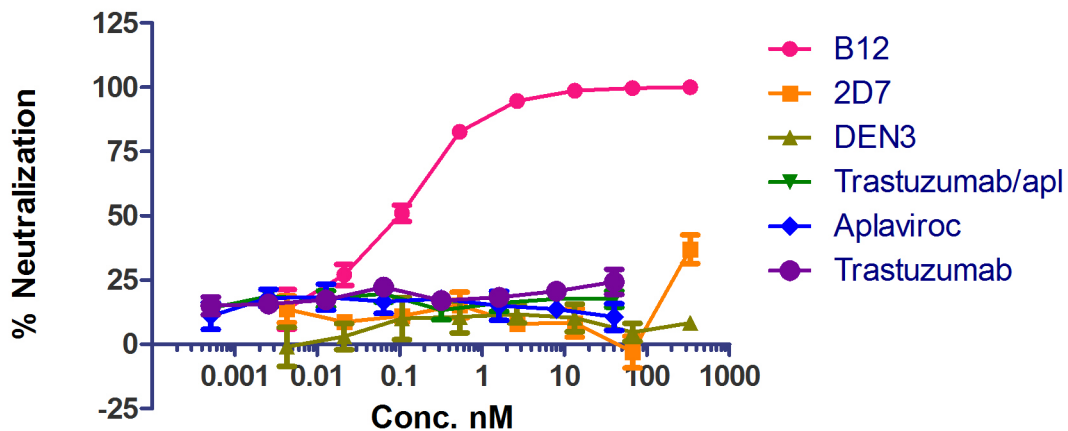



**5.Neutralization Results for 117 Pseudovirus Panel Screen.**  
IC50s for the full panel.

| Virus ID           | Clade*  | IC50 Titer in TZM-bl cells, µg/ml |               | IC50 Titer in TZM-bl cells, nM |         |               |
|--------------------|---------|-----------------------------------|---------------|--------------------------------|---------|---------------|
|                    |         | PG9**                             | PG9/aplaviroc | Aplaviroc (nM)                 | PG9**   | PG9/aplaviroc |
| 6535.3             | B       | 0.176                             | 0.494         | 1.021                          | 1.173   | 3.294         |
| QH0692.42          | B       | >50                               | 10.817        | 17.438                         | >333    | 72.112        |
| SC422661.8         | B       | 0.553                             | 2.279         | 7.309                          | 3.687   | 15.193        |
| PVO.4              | B       | 10.564                            | 0.716         | 0.805                          | 70.427  | 4.773         |
| TRO.11             | B       | 43.247                            | 6.544         | 19.277                         | 288.313 | 43.624        |
| AC10.0.29          | B       | 0.117                             | 0.192         | 25.034                         | 0.78    | 1.277         |
| RHPA4259.7         | B       | 22.620                            | 2.035         | 2.843                          | 150.8   | 13.569        |
| THRO4156.18        | B       | 24.475                            | 4.856         | 11.205                         | 163.167 | 32.376        |
| REJO4541.67        | B       | 0.012                             | 0.020         | 21.009                         | 0.08    | 0.134         |
| TRJO4551.58        | B       | 0.503                             | 1.120         | 25.481                         | 3.353   | 7.468         |
| WITO4160.33        | B       | 0.010                             | 0.012         | 4.593                          | 0.067   | 0.078         |
| CAAN5342.A2        | B       | 4.603                             | 4.701         | 6.255                          | 30.687  | 31.339        |
| Median             |         | 0.553                             | 1.578         | 9.257                          | 3.687   | 10.518        |
| Mean               |         | 9.716                             | 2.815         | 11.856                         | 64.776  | 18.770        |
| STD                |         | 14.408                            | 3.327         | 9.319                          | 96.053  | 22.181        |
| WEAU_d15_410_5017  | B (T/F) | 4.078                             | 1.087         | 100.000                        | 27.187  | 7.250         |
| 1006_11_C3_1601    | B (T/F) | 0.366                             | 0.466         | 4.086                          | 2.44    | 3.109         |
| 1054_07_TC4_1499   | B (T/F) | >50                               | 6.916         | 7.873                          | >333    | 46.107        |
| 1056_10_TA11_1826  | B (T/F) | 6.339                             | 4.513         | 6.238                          | 42.26   | 30.084        |
| 1012_11_TC21_3257  | B (T/F) | 0.172                             | 0.470         | 21.247                         | 1.147   | 3.132         |
| 6240_08_TA5_4622   | B (T/F) | 1.747                             | 2.998         | 14.962                         | 11.647  | 19.989        |
| 6244_13_B5_4576    | B (T/F) | >50                               | 7.674         | 9.738                          | >333    | 51.160        |
| 62357_14_D3_4589   | B (T/F) | >50                               | 4.305         | 4.156                          | >333    | 28.700        |
| SC05_8C11_2344     | B (T/F) | 0.892                             | 1.385         | 5.663                          | 5.947   | 9.233         |
| Median             |         | 1.320                             | 2.998         | 7.873                          | 8.797   | 19.989        |
| Mean               |         | 2.266                             | 3.313         | 19.329                         | 15.105  | 22.085        |
| STD                |         | 2.450                             | 2.724         | 30.770                         | 16.337  | 18.163        |
| Du156.12           | C       | 0.026                             | 0.088         | 17.108                         | 0.173   | 0.588         |
| Du172.17           | C       | 0.606                             | 0.581         | 10.435                         | 4.04    | 3.871         |
| Du422.1            | C       | 0.614                             | 0.512         | 10.456                         | 4.093   | 3.412         |
| ZM197M.PB7         | C       | 0.899                             | 0.442         | 2.343                          | 5.993   | 2.947         |
| ZM214M.PL15        | C       | >50                               | 2.136         | 2.419                          | >333    | 14.241        |
| ZM233M.PB6         | C       | 0.010                             | 0.003         | 0.847                          | 0.067   | 0.023         |
| ZM249M.PL1         | C       | 0.166                             | 0.110         | 0.817                          | 1.107   | 0.734         |
| ZM53M.PB12         | C       | 0.069                             | 0.112         | 0.656                          | 0.46    | 0.745         |
| ZM109F.PB4         | C       | 0.256                             | 0.309         | 1.325                          | 1.707   | 2.061         |
| ZM135M.PL10a       | C       | 20.559                            | 5.023         | 5.045                          | 137.06  | 33.485        |
| CAP45.2.00.G3      | C       | 0.007                             | 0.003         | 0.693                          | 0.0467  | 0.017         |
| CAP210.2.00.E8     | C       | 0.040                             | 0.261         | 15.878                         | 0.267   | 1.737         |
| HIV-001428-2.42    | C       | 0.101                             | 0.003         | 4.599                          | 0.673   | 0.017         |
| HIV-0013095-2.11   | C       | 0.010                             | 0.039         | 0.947                          | 0.067   | 0.263         |
| HIV-16055-2.3      | C       | 0.021                             | 0.022         | 1.781                          | 0.14    | 0.145         |
| HIV-16845-2.22     | C       | 4.398                             | 4.444         | 5.539                          | 29.32   | 29.624        |
| Median             |         | 0.101                             | 0.186         | 2.381                          | 0.673   | 1.241         |
| Mean               |         | 1.852                             | 0.880         | 5.056                          | 12.348  | 5.869         |
| STD                |         | 5.293                             | 1.594         | 5.482                          | 35.287  | 10.629        |
| Ce1086_B2          | C (T/F) | >50                               | 1.183         | 1.145                          | >333    | 7.888         |
| Ce0393_C3          | C (T/F) | 0.020                             | 0.024         | 0.330                          | 0.133   | 0.157         |
| Ce1176_A3          | C (T/F) | 0.014                             | 0.034         | 14.886                         | 0.093   | 0.224         |
| Ce2010_F5          | C (T/F) | >50                               | 11.145        | 19.793                         | >333    | 74.297        |
| Ce0682_E4          | C (T/F) | 0.196                             | 0.208         | 1.901                          | 1.307   | 1.384         |
| Ce1172_H1          | C (T/F) | 0.070                             | 0.106         | 6.919                          | 0.467   | 0.706         |
| Ce2060_G9          | C (T/F) | 0.045                             | 0.104         | 4.183                          | 0.3     | 0.695         |
| Ce703010054_2A2    | C (T/F) | 0.022                             | 0.014         | 0.394                          | 0.147   | 0.095         |
| BF1266.431a        | C (T/F) | 0.026                             | 0.080         | 1.471                          | 0.173   | 0.532         |
| 246F_C1G           | C (T/F) | >50                               | 1.262         | 1.734                          | >333    | 8.414         |
| 249M_B10           | C (T/F) | 0.095                             | 0.129         | 0.699                          | 0.633   | 0.863         |
| ZM247v1(Rev-)      | C (T/F) | 0.112                             | 0.138         | 0.891                          | 0.747   | 0.918         |
| 7030102001E5(Rev-) | C (T/F) | >50                               | 6.763         | 5.871                          | >333    | 45.087        |
| 1394C9G1(Rev-)     | C (T/F) | 0.029                             | 0.043         | 2.306                          | 0.193   | 0.286         |
| Ce704809221_1B3    | C (T/F) | 0.037                             | 0.201         | 12.650                         | 0.247   | 1.339         |
| Median             |         | 0.037                             | 0.129         | 1.901                          | 0.247   | 0.863         |
| Mean               |         | 0.061                             | 1.429         | 5.012                          | 0.404   | 9.526         |
| STD                |         | 0.061                             | 1.429         | 5.012                          | 0.404   | 9.526         |
| CNE19              | BC      | 0.024                             | 0.055         | 2.444                          | 0.16    | 0.364         |
| CNE20              | BC      | 0.052                             | 0.182         | 1.694                          | 0.347   | 1.216         |
| CNE21              | BC      | 0.038                             | 0.112         | 0.748                          | 0.253   | 0.745         |
| CNE17              | BC      | 0.210                             | 0.332         | 5.516                          | 1.4     | 2.213         |
| CNE30              | BC      | >50                               | 9.645         | 11.919                         | >333    | 64.297        |
| CNE52              | BC      | 0.029                             | 0.176         | >100                           | 0.193   | 1.176         |
| CNE53              | BC      | 0.131                             | 0.700         | 18.158                         | 0.873   | 4.666         |
| CNE58              | BC      | 0.038                             | 0.229         | 20.777                         | 0.253   | 1.524         |
| Median             |         | 0.038                             | 0.205         | 5.516                          | 0.253   | 1.370         |
| Mean               |         | 0.075                             | 1.429         | 8.751                          | 0.497   | 9.525         |
| STD                |         | 0.070                             | 3.326         | 8.239                          | 0.466   | 22.171        |
| MS208.A1           | A       | 0.005                             | 0.110         | 0.202                          | 0.033   | 0.734         |
| Q23.17             | A       | 0.027                             | 0.013         | 13.939                         | 0.18    | 0.090         |
| Q461.e2            | A       | 1.484                             | 1.470         | 3.681                          | 9.893   | 9.798         |
| Q769.d22           | A       | 0.025                             | 0.020         | 3.424                          | 0.167   | 0.134         |
| Q259.d2.17         | A       | 0.029                             | 0.140         | 10.726                         | 0.193   | 0.935         |
| Q842.d12           | A       | 0.023                             | 0.058         | 37.578                         | 0.153   | 0.387         |
| 0330.v4.c3         | A       | 0.026                             | 0.035         | 2.390                          | 0.173   | 0.235         |
| 0260.v5.c36        | A       | 1.693                             | 1.866         | 17.280                         | 11.287  | 12.437        |
| Median             |         | 0.0265                            | 0.084         | 7.2035                         | 0.1765  | 0.560         |
| Mean               |         | 0.414                             | 0.464         | 11.153                         | 2.760   | 3.094         |
| STD                |         | 0.727                             | 0.752         | 12.283                         | 4.847   | 5.011         |

IC50s continued:

|                  |                |        |        |        |         |         |
|------------------|----------------|--------|--------|--------|---------|---------|
| 191955_A11       | A (T/F)        | 0.053  | 0.017  | 0.032  | 0.353   | 0.112   |
| 191084_B7-19     | A (T/F)        | 0.043  | 0.091  | 4.471  | 0.287   | 0.605   |
| 9004SS_A3_4      | A (T/F)        | 0.088  | 0.130  | 5.825  | 0.587   | 0.868   |
| Median           |                | 0.053  | 0.091  | 4.471  | 0.353   | 0.605   |
| Mean             |                | 0.061  | 0.079  | 3.443  | 0.409   | 0.528   |
| STD              |                | 0.024  | 0.058  | 3.030  | 0.158   | 0.384   |
| T257-31          | CRF02_AG       | 0.037  | 0.089  | 16.777 | 0.247   | 0.594   |
| 928-28           | CRF02_AG       | 0.101  | 0.213  | 9.155  | 0.673   | 1.423   |
| 263-8            | CRF02_AG       | 0.293  | 0.541  | 4.779  | 1.953   | 3.608   |
| T250-4           | CRF02_AG       | 0.005  | 0.001  | 14.339 | 0.033   | 0.007   |
| T251-18          | CRF02_AG       | >50    | 16.982 | 22.188 | >333    | 113.210 |
| T278-50          | CRF02_AG       | 0.393  | 1.484  | 9.074  | 2.62    | 9.893   |
| T255-34          | CRF02_AG       | 0.023  | 0.048  | 6.700  | 0.153   | 0.319   |
| 211-9            | CRF02_AG       | 0.049  | 0.215  | 19.148 | 0.327   | 1.434   |
| 235-47           | CRF02_AG       | 0.233  | 0.531  | 1.075  | 1.553   | 3.540   |
| Median           |                | 0.075  | 0.215  | 9.155  | 0.5     | 1.434   |
| Mean             |                | 0.142  | 2.234  | 11.471 | 0.945   | 14.892  |
| STD              |                | 0.146  | 5.549  | 7.044  | 0.971   | 36.994  |
| 620345.c01       | CRF01_AE       | 1.333  | 2.278  | 6.946  | 8.887   | 15.187  |
| C1080.c03        | CRF01_AE       | 0.004  | 0.006  | 25.834 | 0.0267  | 0.039   |
| R2184.c04        | CRF01_AE       | 0.255  | 0.666  | 5.517  | 1.7     | 4.443   |
| R1166.c01        | CRF01_AE       | 0.736  | 1.108  | 4.644  | 4.907   | 7.389   |
| R3265.c06        | CRF01_AE       | 0.163  | 0.423  | 3.334  | 1.087   | 2.818   |
| C2101.c01        | CRF01_AE       | 0.034  | 0.032  | 1.832  | 0.227   | 0.213   |
| C3347.c11        | CRF01_AE       | 0.032  | 0.176  | 1.756  | 0.213   | 1.176   |
| C4118.c09        | CRF01_AE       | 0.068  | 0.071  | 0.603  | 0.453   | 0.476   |
| CNE5             | CRF01_AE       | 0.018  | 0.020  | 1.186  | 0.12    | 0.134   |
| BJOX009000.02.4  | CRF01_AE       | 1.725  | 2.957  | 3.915  | 11.5    | 19.714  |
| Median           |                | 0.116  | 0.300  | 3.625  | 0.770   | 1.997   |
| Mean             |                | 0.437  | 0.774  | 5.557  | 2.912   | 5.159   |
| STD              |                | 0.622  | 1.045  | 7.405  | 4.149   | 6.969   |
| BJOX015000.11.5  | CRF01_AE (T/F) | 0.322  | 0.748  | 2.991  | 2.147   | 4.986   |
| BJOX010000.06.2  | CRF01_AE (T/F) | 0.154  | 0.603  | 1.529  | 1.027   | 4.023   |
| BJOX025000.01.1  | CRF01_AE (T/F) | 0.144  | 0.309  | 0.436  | 0.96    | 2.061   |
| BJOX028000.10.3  | CRF01_AE (T/F) | 1.100  | 0.597  | 0.372  | 7.333   | 3.977   |
| Median           |                | 0.238  | 0.600  | 0.983  | 1.587   | 4.000   |
| Mean             |                | 0.430  | 0.564  | 1.332  | 2.867   | 3.762   |
| STD              |                | 0.454  | 0.184  | 1.227  | 3.027   | 1.225   |
| X1193_c1         | G              | 0.105  | 0.355  | 2.076  | 0.7     | 2.364   |
| P0402_c2_11      | G              | 0.296  | 0.317  | 1.341  | 1.973   | 2.112   |
| X1254_c3         | G              | 0.065  | 0.311  | 3.047  | 0.433   | 2.073   |
| X2088_c9         | G              | >50    | 10.453 | 12.647 | >333    | 69.687  |
| X2131_C1_B5      | G              | 0.084  | 0.511  | 3.621  | 0.56    | 3.406   |
| P1981_C5_3       | G              | 0.258  | 1.062  | 25.451 | 1.72    | 7.082   |
| X1632_S2_B10     | G              | 0.107  | 0.681  | 6.005  | 0.713   | 4.538   |
| Median           |                | 0.106  | 0.511  | 3.621  | 0.7065  | 3.406   |
| Mean             |                | 0.153  | 1.956  | 7.741  | 1.017   | 13.037  |
| STD              |                | 0.098  | 3.757  | 8.687  | 0.656   | 25.044  |
| 3016.v5.c45      | D              | 2.455  | 0.409  | 0.394  | 16.367  | 2.729   |
| A07412M1.vrc12   | D              | 0.697  | 1.296  | 9.851  | 4.647   | 8.639   |
| 231965.c01       | D              | 1.285  | 1.943  | 5.641  | 8.567   | 12.952  |
| 231966.c02       | D              | 0.075  | 0.107  | 4.337  | 0.5     | 0.712   |
| Median           |                | 0.991  | 0.853  | 4.989  | 6.607   | 5.684   |
| Mean             |                | 1.128  | 0.939  | 5.056  | 7.520   | 6.258   |
| STD              |                | 1.013  | 0.838  | 3.898  | 6.755   | 5.589   |
| 191821_E6_1      | D (T/F)        | 3.600  | 0.313  | 0.188  | 24      | 2.084   |
| Median(D+D(T/F)) |                | 1.285  | 0.409  | 4.337  | 8.567   | 2.729   |
| Mean(D+D(T/F))   |                | 1.622  | 0.813  | 4.082  | 10.816  | 5.423   |
| STD(D+D(T/F))    |                | 1.411  | 0.778  | 4.017  | 9.410   | 5.187   |
| 3817.v2.c59      | CD             | 0.020  | 0.003  | 4.230  | 0.133   | 0.017   |
| 6480.v4.c25      | CD             | >50    | 1.476  | 1.378  | >333    | 9.843   |
| 6952.v1.c20      | CD             | >50    | 1.666  | 1.642  | >333    | 11.109  |
| 6811.v7.c18      | CD             | >50    | 5.080  | 6.954  | >333    | 33.866  |
| 89-F1_2_25       | CD             | 0.668  | 0.587  | 0.573  | 4.453   | 3.916   |
| Median           |                | 0.344  | 1.476  | 1.642  | 2.293   | 9.843   |
| Mean             |                | 0.344  | 1.763  | 2.955  | 2.293   | 11.750  |
| STD              |                | 0.458  | 1.973  | 2.622  | 3.055   | 13.155  |
| 3301.v1.c24      | AC             | 0.216  | 0.445  | 4.349  | 1.44    | 2.969   |
| 6041.v3.c23      | AC             | 0.244  | 0.627  | 3.498  | 1.627   | 4.179   |
| 6540.v4.c1       | AC             | 0.070  | 0.116  | 13.148 | 0.467   | 0.773   |
| 6545.v4.c1       | AC             | 0.099  | 0.287  | 4.814  | 0.66    | 1.910   |
| Median           |                | 0.158  | 0.366  | 4.582  | 1.050   | 2.439   |
| Mean             |                | 0.157  | 0.369  | 6.452  | 1.049   | 2.458   |
| STD              |                | 0.086  | 0.218  | 4.497  | 0.571   | 1.456   |
| 0815.v3.c3       | ACD            | >50    | 1.399  | 1.532  | >333    | 9.328   |
| 3103.v3.c10      | ACD            | 28.004 | 27.728 | 63.328 | 186.693 | 184.851 |
| Median           |                | 28.004 | 14.563 | 32.430 | 186.693 | 97.089  |
| Mean             |                | 28.004 | 14.563 | 32.430 | 186.693 | 97.089  |
| STD              |                |        | 18.617 | 43.696 |         | 124.114 |

Note: Calculation of Mean and Median omits any values with ">" sign.

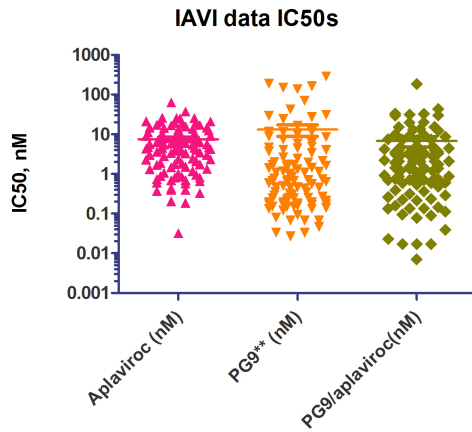

**Figure 1.** Graphical representation of the IC50s for all samples. PG9 IC50s > 333 nM are omitted for clarity.

**Statistical analysis for a set of pseudoviruses, where PG9 IC50 < 50 ug/ml.**

The following Mean and Median IC50s were calculated by GraphPad Prism analysis:

PG9 Median IC50 = 0.713 nM, Mean IC50 = 1.91 nM

PG9/aplaviroc Median IC50 = 13.1 nM, Mean IC50 = 6.79 nM

Aplaviroc Median IC50 = 4.35 nM, Mean IC50 = 7.56 nM.

Mann Whitney test has shown that in this set of samples there is no statistically significant difference between Median IC50 values of PG9 and PG9/aplaviroc (P value 0.0547).

Mann Whitney test has shown that in this set of samples there is statistically significant difference between Median IC50 values of Aplaviroc and PG9/aplaviroc (P value 0.0002).

Pseudoviruses where PG9-aplaviroc has improved IC50 relative to wildtype PG9. Pseudoviruses neutralized by PG9 with IC50>50 µg/ml (>333nM) are grouped separately.

Improved IC50s for PG9/apl vs PG9

| Virus ID          | Clade*   | IC50 Titer in TZM-bl cells, µg/ml |               | IC50 Titer in TZM-bl cells, nM |         |               |
|-------------------|----------|-----------------------------------|---------------|--------------------------------|---------|---------------|
|                   |          | PG9**                             | PG9/aplaviroc | Aplaviroc (nM)                 | PG9**   | PG9/aplaviroc |
| PVO.4             | B        | 10.564                            | 0.716         | 0.805                          | 70.427  | 4.773         |
| TRO.11            | B        | 43.247                            | 6.544         | 19.277                         | 288.313 | 43.624        |
| RHPA4259.7        | B        | 22.620                            | 2.035         | 2.843                          | 150.8   | 13.569        |
| THRO4156.18       | B        | 24.475                            | 4.856         | 11.205                         | 163.167 | 32.376        |
| 1056_10_TA11_1826 | B (T/F)  | 6.339                             | 4.513         | 6.238                          | 42.26   | 30.084        |
| Du172.17          | C        | 0.606                             | 0.581         | 10.435                         | 4.04    | 3.871         |
| Du422.1           | C        | 0.614                             | 0.512         | 10.456                         | 4.093   | 3.412         |
| ZM197M.PB7        | C        | 0.899                             | 0.442         | 2.343                          | 5.993   | 2.947         |
| ZM233M.PB6        | C        | 0.010                             | 0.003         | 0.847                          | 0.067   | 0.023         |
| ZM249M.PL1        | C        | 0.166                             | 0.110         | 0.817                          | 1.107   | 0.734         |
| HIV-001428-2.42   | C        | 0.101                             | 0.003         | 4.599                          | 0.673   | 0.017         |
| Ce703010054_2A2   | C (T/F)  | 0.022                             | 0.014         | 0.394                          | 0.147   | 0.095         |
| Q23.17            | A        | 0.027                             | 0.013         | 13.939                         | 0.18    | 0.090         |
| Q461.e2           | A        | 1.484                             | 1.470         | 3.681                          | 9.893   | 9.798         |
| Q769.d22          | A        | 0.025                             | 0.020         | 3.424                          | 0.167   | 0.134         |
| 191955_A11        | A (T/F)  | 0.053                             | 0.017         | 0.032                          | 0.353   | 0.112         |
| T250-4            | CRF02_AG | 0.005                             | 0.001         | 14.339                         | 0.033   | 0.007         |
| C2101.c01         | CRF01_AE | 0.034                             | 0.032         | 1.832                          | 0.227   | 0.213         |
| 3016.v5.c45       | D        | 2.455                             | 0.409         | 0.394                          | 16.367  | 2.729         |
| 191821_E6_1       | D (T/F)  | 3.600                             | 0.313         | 0.188                          | 24      | 2.084         |
| 3817.v2.c59       | CD       | 0.020                             | 0.003         | 4.230                          | 0.133   | 0.017         |
| 89-F1_2_25        | CD       | 0.668                             | 0.587         | 0.573                          | 4.453   | 3.916         |
| 3103.v3.c10       | ACD      | 28.004                            | 27.728        | 63.328                         | 186.693 | 184.851       |
| Median            |          | 0.614                             | 0.409         | 3.424                          | 4.093   | 2.729         |
| Mean              |          | 6.349                             | 2.214         | 7.662                          | 42.330  | 14.760        |
| STD               |          | 11.703                            | 5.843         | 13.312                         | 78.018  | 38.953        |

Average improvement of 2.87 fold relative to PG9  
Average decrease of potency relative to aplaviroc: 1.93 fold

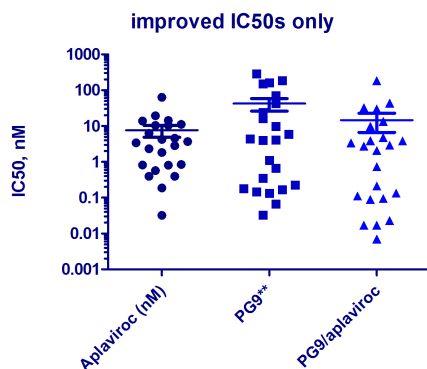

Figure 2. Graphical representation of the improved IC50s. Pseudoviruses where PG9 has IC50>50 µg/ml are grouped separately.

**Statistical analysis for a set of pseudoviruses, where PG9/aplaviroc has improved IC50s relative to PG9.**

The following Mean and Median IC50s were calculated by GraphPad Prism analysis:

PG9 Median IC50 = 4.09nM, Mean IC50 = 42.33nM  
PG9/aplaviroc Median IC50 = 2.73nM, Mean IC50 = 14.76nM  
Aplaviroc Median IC50 = 3.42nM, Mean IC50 = 7.66nM.

Mann Whitney test has shown that in this set of samples there is no statistically significant difference between Median IC50 values of PG9 and PG9/aplaviroc (P value 0.1533).

Mann Whitney test has shown that in this set of samples there is no statistically significant difference between Median IC50 values of Aplaviroc and PG9/aplaviroc (P value 0.3018).

Pseudoviruses neutralized by PG9 with IC50>50 µg/ml (>333nM):

Improved from IC50 >50 ug/ml

| Virus ID           | Clade*   | IC50 Titer in TZM-bl cells, µg/ml |               | IC50 Titer in TZM-bl cells, nM |                |               |
|--------------------|----------|-----------------------------------|---------------|--------------------------------|----------------|---------------|
|                    |          | PG9**                             | PG9/aplaviroc | Aplaviroc (nM)                 | PG9**          | PG9/aplaviroc |
| QH0692.42          | B        | >50                               | 10.817        | 17.438                         | >333           | 72.112        |
| 1054_07_TC4_1499   | B (T/F)  | >50                               | 6.916         | 7.873                          | >333           | 46.107        |
| 6244_13_B5_4576    | B (T/F)  | >50                               | 7.674         | 9.738                          | >333           | 51.160        |
| 62357_14_D3_4589   | B (T/F)  | >50                               | 4.305         | 4.156                          | >333           | 28.700        |
| ZM214M.PL15        | C        | >50                               | 2.136         | 2.419                          | >333           | 14.241        |
| Ce1086_B2          | C (T/F)  | >50                               | 1.183         | 1.145                          | >333           | 7.888         |
| Ce2010_F5          | C (T/F)  | >50                               | 11.145        | 19.793                         | >333           | 74.297        |
| 246F C1G           | C (T/F)  | >50                               | 1.262         | 1.734                          | >333           | 8.414         |
| 7030102001E5(Rev-) | C (T/F)  | >50                               | 6.763         | 5.871                          | >333           | 45.087        |
| CNE30              | BC       | >50                               | 9.645         | 11.919                         | >333           | 64.297        |
| T251-18            | CRF02_AG | >50                               | 16.982        | 22.188                         | >333           | 113.210       |
| X2088_c9           | G        | >50                               | 10.453        | 12.647                         | >333           | 69.687        |
| 6480.v4.c25        | CD       | >50                               | 1.476         | 1.378                          | >333           | 9.843         |
| 6952.v1.c20        | CD       | >50                               | 1.666         | 1.642                          | >333           | 11.109        |
| 6811.v7.c18        | CD       | >50                               | 5.080         | 6.954                          | >333           | 33.866        |
| 0815.v3.c3         | ACD      | >50                               | 1.399         | 1.532                          | >333           | 9.328         |
| <b>Median</b>      |          | <b>&gt;50</b>                     | <b>5.921</b>  | <b>6.413</b>                   | <b>&gt;333</b> | <b>39.476</b> |
| <b>Mean</b>        |          | <b>&gt;50</b>                     | <b>6.181</b>  | <b>8.027</b>                   | <b>&gt;333</b> | <b>41.209</b> |
| <b>STD</b>         |          |                                   | <b>4.703</b>  | <b>6.992</b>                   |                | <b>31.354</b> |

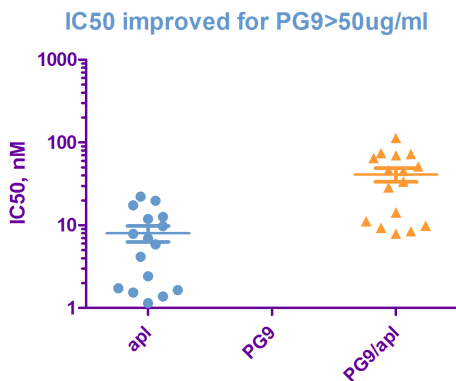

Figure 3. Graphical representation of the IC50s of aplaviroc and PG9-aplaviroc in the panel of pseudoviruses poorly neutralized by PG9 (IC50>50 µg/ml).

**Statistical analysis for a set of pseudoviruses, where PG9 IC50>50ug/ml.**

The following Mean and Median IC50s were calculated by GraphPad Prism analysis:

PG9/aplaviroc Median IC50 = 39.48nM, Mean IC50 = 41.21nM

Aplaviroc Median IC50 =6.41nM, Mean IC50 =8.03nM.

Mann Whitney test has shown that in this set of samples there is statistically significant difference between Median IC50 values of Aplaviroc and PG9/aplaviroc (P value 0.0003).

Pseudoviruses where PG9-aplaviroc shows decreased potency (IC50) relative to wildtype PG9:

Decrease of potency of PG9/apl relative to PG9

| Virus ID          | Clade*         | IC50 Titer in TZM-bl cells, µg/ml |               | IC50 Titer in TZM-bl cells, nM |        |               |
|-------------------|----------------|-----------------------------------|---------------|--------------------------------|--------|---------------|
|                   |                | PG9**                             | PG9/aplaviroc | Aplaviroc (nM)                 | PG9**  | PG9/aplaviroc |
| 6535.3            | B              | 0.176                             | 0.494         | 1.021                          | 1.173  | 3.294         |
| SC422661.8        | B              | 0.553                             | 2.279         | 7.309                          | 3.687  | 15.193        |
| AC10.0.29         | B              | 0.117                             | 0.192         | 25.034                         | 0.78   | 1.277         |
| REJO4541.67       | B              | 0.012                             | 0.020         | 21.009                         | 0.08   | 0.134         |
| TRJO4551.58       | B              | 0.503                             | 1.120         | 25.481                         | 3.353  | 7.468         |
| WITO4160.33       | B              | 0.010                             | 0.012         | 4.593                          | 0.067  | 0.078         |
| CAAN5342.A2       | B              | 4.603                             | 4.701         | 6.255                          | 30.687 | 31.339        |
| WEAU_d15_410_5017 | B (T/F)        | 4.078                             | 1.087         | >100                           | 27.187 | 7.250         |
| 1006_11_C3_1601   | B (T/F)        | 0.366                             | 0.466         | 4.086                          | 2.44   | 3.109         |
| 1012_11_TC21_3257 | B (T/F)        | 0.172                             | 0.470         | 21.247                         | 1.147  | 3.132         |
| 6240_08_TA5_4622  | B (T/F)        | 1.747                             | 2.998         | 14.962                         | 11.647 | 19.989        |
| SC05_8C11_2344    | B (T/F)        | 0.892                             | 1.385         | 5.663                          | 5.947  | 9.233         |
| Du156.12          | C              | 0.026                             | 0.088         | 17.108                         | 0.173  | 0.588         |
| ZM53M.PB12        | C              | 0.069                             | 0.112         | 0.656                          | 0.46   | 0.745         |
| ZM109F.PB4        | C              | 0.256                             | 0.309         | 1.325                          | 1.707  | 2.061         |
| CAP210.2.00.E8    | C              | 0.040                             | 0.261         | 15.878                         | 0.267  | 1.737         |
| HIV-0013095-2.11  | C              | 0.010                             | 0.039         | 0.947                          | 0.067  | 0.263         |
| HIV-16055-2.3     | C              | 0.021                             | 0.022         | 1.781                          | 0.14   | 0.145         |
| HIV-16845-2.22    | C              | 4.398                             | 4.444         | 5.539                          | 29.32  | 29.624        |
| Ce0393_C3         | C (T/F)        | 0.020                             | 0.024         | 0.330                          | 0.133  | 0.157         |
| Ce1176_A3         | C (T/F)        | 0.014                             | 0.034         | 14.886                         | 0.093  | 0.224         |
| Ce0682_E4         | C (T/F)        | 0.196                             | 0.208         | 1.901                          | 1.307  | 1.384         |
| Ce1172_H1         | C (T/F)        | 0.070                             | 0.106         | 6.919                          | 0.467  | 0.706         |
| Ce2060_G9         | C (T/F)        | 0.045                             | 0.104         | 4.183                          | 0.3    | 0.695         |
| 249M B10          | C (T/F)        | 0.095                             | 0.129         | 0.699                          | 0.633  | 0.863         |
| ZM247v1(Rev-)     | C (T/F)        | 0.112                             | 0.138         | 0.891                          | 0.747  | 0.918         |
| 1394C9G1(Rev-)    | C (T/F)        | 0.029                             | 0.043         | 2.306                          | 0.193  | 0.286         |
| Ce704809221_1B3   | C (T/F)        | 0.037                             | 0.201         | 12.650                         | 0.247  | 1.339         |
| CNE19             | BC             | 0.024                             | 0.055         | 2.444                          | 0.16   | 0.364         |
| CNE20             | BC             | 0.052                             | 0.182         | 1.694                          | 0.347  | 1.216         |
| CNE21             | BC             | 0.038                             | 0.112         | 0.748                          | 0.253  | 0.745         |
| CNE17             | BC             | 0.210                             | 0.332         | 5.516                          | 1.4    | 2.213         |
| CNE52             | BC             | 0.029                             | 0.176         | >100                           | 0.193  | 1.176         |
| CNE53             | BC             | 0.131                             | 0.700         | 18.158                         | 0.873  | 4.666         |
| CNE58             | BC             | 0.038                             | 0.229         | 20.777                         | 0.253  | 1.524         |
| MS208.A1          | A              | 0.005                             | 0.110         | 0.202                          | 0.033  | 0.734         |
| Q259.d2.17        | A              | 0.029                             | 0.140         | 10.726                         | 0.193  | 0.935         |
| Q842.d12          | A              | 0.023                             | 0.058         | 37.578                         | 0.153  | 0.387         |
| 0330.v4.c3        | A              | 0.026                             | 0.035         | 2.390                          | 0.173  | 0.235         |
| 0260.v5.c36       | A              | 1.693                             | 1.866         | 17.280                         | 11.287 | 12.437        |
| 191084 B7-19      | A (T/F)        | 0.043                             | 0.091         | 4.471                          | 0.287  | 0.605         |
| 9004SS_A3_4       | A (T/F)        | 0.088                             | 0.130         | 5.825                          | 0.587  | 0.868         |
| T257-31           | CRF02_AG       | 0.037                             | 0.089         | 16.777                         | 0.247  | 0.594         |
| 928-28            | CRF02_AG       | 0.101                             | 0.213         | 9.155                          | 0.673  | 1.423         |
| 263-8             | CRF02_AG       | 0.293                             | 0.541         | 4.779                          | 1.953  | 3.608         |
| T278-50           | CRF02_AG       | 0.393                             | 1.484         | 9.074                          | 2.62   | 9.893         |
| T255-34           | CRF02_AG       | 0.023                             | 0.048         | 6.700                          | 0.153  | 0.319         |
| 211-9             | CRF02_AG       | 0.049                             | 0.215         | 19.148                         | 0.327  | 1.434         |
| 235-47            | CRF02_AG       | 0.233                             | 0.531         | 1.075                          | 1.553  | 3.540         |
| 620345.c01        | CRF01_AE       | 1.333                             | 2.278         | 6.946                          | 8.887  | 15.187        |
| C1080.c03         | CRF01_AE       | 0.004                             | 0.006         | 25.834                         | 0.0267 | 0.039         |
| R2184.c04         | CRF01_AE       | 0.255                             | 0.666         | 5.517                          | 1.7    | 4.443         |
| R1166.c01         | CRF01_AE       | 0.736                             | 1.108         | 4.644                          | 4.907  | 7.389         |
| R3265.c06         | CRF01_AE       | 0.163                             | 0.423         | 3.334                          | 1.087  | 2.818         |
| C3347.c11         | CRF01_AE       | 0.032                             | 0.176         | 1.756                          | 0.213  | 1.176         |
| C4118.c09         | CRF01_AE       | 0.068                             | 0.071         | 0.603                          | 0.453  | 0.476         |
| CNE5              | CRF01_AE       | 0.018                             | 0.020         | 1.186                          | 0.12   | 0.134         |
| BJOX009000.02.4   | CRF01_AE       | 1.725                             | 2.957         | 3.915                          | 11.5   | 19.714        |
| BJOX015000.11.5   | CRF01_AE (T/F) | 0.322                             | 0.748         | 2.991                          | 2.147  | 4.986         |

Decreased potency (IC50) continued on the next page.

|                 |                |       |       |        |       |        |
|-----------------|----------------|-------|-------|--------|-------|--------|
| BJOX010000.06.2 | CRF01_AE (T/F) | 0.154 | 0.603 | 1.529  | 1.027 | 4.023  |
| BJOX025000.01.1 | CRF01_AE (T/F) | 0.144 | 0.309 | 0.436  | 0.96  | 2.061  |
| BJOX028000.10.3 | CRF01_AE (T/F) | 1.100 | 0.597 | 0.372  | 7.333 | 3.977  |
| X1193_c1        | G              | 0.105 | 0.355 | 2.076  | 0.7   | 2.364  |
| P0402_c2_11     | G              | 0.296 | 0.317 | 1.341  | 1.973 | 2.112  |
| X1254_c3        | G              | 0.065 | 0.311 | 3.047  | 0.433 | 2.073  |
| X2131_C1_B5     | G              | 0.084 | 0.511 | 3.621  | 0.56  | 3.406  |
| P1981_C5_3      | G              | 0.258 | 1.062 | 25.451 | 1.72  | 7.082  |
| X1632_S2_B10    | G              | 0.107 | 0.681 | 6.005  | 0.713 | 4.538  |
| A07412M1.vrc12  | D              | 0.697 | 1.296 | 9.851  | 4.647 | 8.639  |
| 231965.c01      | D              | 1.285 | 1.943 | 5.641  | 8.567 | 12.952 |
| 231966.c02      | D              | 0.075 | 0.107 | 4.337  | 0.5   | 0.712  |
| 3301.v1.c24     | AC             | 0.216 | 0.445 | 4.349  | 1.44  | 2.969  |
| 6041.v3.c23     | AC             | 0.244 | 0.627 | 3.498  | 1.627 | 4.179  |
| 6540.v4.c1      | AC             | 0.070 | 0.116 | 13.148 | 0.467 | 0.773  |
| 6545.v4.c1      | AC             | 0.099 | 0.287 | 4.814  | 0.66  | 1.910  |
| Median          |                | 0.101 | 0.261 | 4.644  | 0.673 | 1.737  |
| Mean            |                | 0.425 | 0.625 | 7.745  | 2.834 | 4.164  |
| STD             |                | 0.907 | 0.936 | 8.065  | 6.044 | 6.241  |

Average decrease of potency of PG9/apl relative to PG9: 1.47 fold  
Average improvement of potency for PG9/apl relative to aplaviroc: 2.45 fold

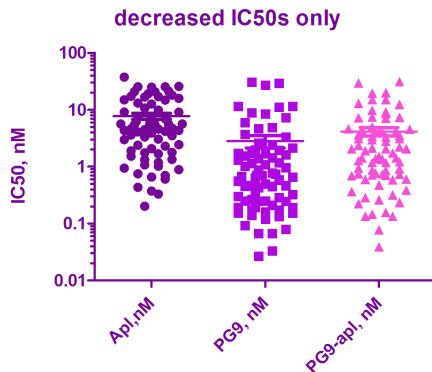

**Figure 4.** Graphical representation of IC50s in the pseudovirus panel where PG9-aplaviroc has decreased potency relative to PG9.

### Statistical analysis for a set of pseudoviruses, where PG9/aplaviroc has decreased potency relative to PG9.

The following Mean and Median IC50s were calculated by GraphPad Prism analysis:

PG9 Median IC50 = 0.67nM, Mean IC50 = 2.73nM

PG9/aplaviroc Median IC50 = 1.74nM, Mean IC50 = 4.16nM

Aplaviroc Median IC50 =4.64nM, Mean IC50 =7.75nM.

Mann Whitney test has shown that in this set of samples there is statistically significant difference between Median IC50 values of PG9 and PG9/aplaviroc (P value 0.0012).

Mann Whitney test has shown that in this set of samples there is no statistically significant difference between Median IC50 values of Aplaviroc and PG9/aplaviroc (P value <0.0001).



## IC80s for the full panel.

| Virus ID           | Clade*  | IC80 Titer in TZM-bl cells, µg/ml |               | IC80 Titer in TZM-bl cells, nM |         |               |
|--------------------|---------|-----------------------------------|---------------|--------------------------------|---------|---------------|
|                    |         | PG9*                              | PG9/aplaviroc | Aplaviroc (nM)                 | PG9*    | PG9/aplaviroc |
| 6535.3             | B       | 0.627                             | 1.490         | 12.517                         | 4.18    | 9.933         |
| QH0692.42          | B       | >50                               | >50           | 98.769                         | >333    | >333          |
| SC422661.8         | B       | 7.054                             | 12.585        | 79.320                         | 47.027  | 83.899        |
| PVO.4              | B       | >50                               | 8.239         | 11.173                         | >333    | 54.930        |
| TRO.11             | B       | >50                               | 35.584        | 100.000                        | >333    | 237.227       |
| AC10.0.29          | B       | 0.845                             | 1.810         | 87.686                         | 5.633   | 12.067        |
| RHPA4259.7         | B       | >50                               | 7.092         | 19.358                         | >333    | 47.277        |
| THRO4156.18        | B       | >50                               | 20.071        | 61.850                         | >333    | 133.804       |
| REJO4541.67        | B       | 0.163                             | 0.185         | 82.676                         | 1.087   | 1.233         |
| TRJO4551.58        | B       | 4.061                             | 8.795         | 100.000                        | 27.073  | 58.633        |
| WITO4160.33        | B       | 0.037                             | 0.049         | 78.852                         | 0.247   | 0.325         |
| CAAN5342.A2        | B       | 26.992                            | 13.870        | 30.832                         | 179.947 | 92.465        |
| Median             |         | 0.845                             | 8.239         | 79.086                         | 5.633   | 54.930        |
| Mean               |         | 5.683                             | 9.979         | 63.586                         | 37.885  | 66.527        |
| STD                |         | 9.746                             | 10.609        | 35.295                         | 64.973  | 70.726        |
| WEAU_d15_410_5017  | B (T/F) | >50                               | 19.772        | >100                           | >333    | 131.815       |
| 1006_11_C3_1601    | B (T/F) | 1.906                             | 2.119         | 32.098                         | 12.707  | 14.129        |
| 1054_07_TC4_1499   | B (T/F) | >50                               | 36.094        | 57.473                         | >333    | 240.628       |
| 1056_10_TA11_1826  | B (T/F) | 38.259                            | 23.408        | 66.049                         | 255.06  | 156.056       |
| 1012_11_TC21_3257  | B (T/F) | 0.605                             | 4.402         | 98.066                         | 4.034   | 29.345        |
| 6240_08_TA5_4622   | B (T/F) | 6.333                             | 10.408        | 67.658                         | 42.22   | 69.384        |
| 6244_13_B5_4576    | B (T/F) | >50                               | 28.640        | 46.026                         | >333    | 190.935       |
| 62357_14_D3_4589   | B (T/F) | >50                               | 17.254        | 16.826                         | >333    | 115.025       |
| SC05_8C11_2344     | B (T/F) | 4.283                             | 6.784         | 32.815                         | 28.553  | 45.227        |
| Median             |         | 4.283                             | 17.254        | 51.750                         | 28.553  | 115.025       |
| Mean               |         | 10.277                            | 16.542        | 52.126                         | 68.515  | 110.283       |
| STD                |         | 15.796                            | 11.592        | 25.722                         | 105.309 | 77.280        |
| Du156.12           | C       | 0.190                             | 0.342         | 93.800                         | 1.267   | 2.280         |
| Du172.17           | C       | 1.604                             | 2.746         | 62.373                         | 10.693  | 18.308        |
| Du422.1            | C       | 10.398                            | 2.824         | 52.130                         | 69.32   | 18.824        |
| ZM197M.PB7         | C       | 4.517                             | 2.214         | 13.654                         | 30.113  | 14.762        |
| ZM214M.PL15        | C       | >50                               | 18.933        | 40.579                         | >333    | 126.218       |
| ZM233M.PB6         | C       | 0.026                             | 0.030         | 3.294                          | 0.173   | 0.202         |
| ZM249M.PL1         | C       | 1.410                             | 0.409         | 4.246                          | 9.4     | 2.729         |
| ZM53M.PB12         | C       | 0.221                             | 0.509         | 6.009                          | 1.473   | 3.395         |
| ZM109F.PB4         | C       | 6.689                             | 2.457         | 10.570                         | 44.593  | 16.381        |
| ZM135M.PL10a       | C       | >50                               | 21.958        | 21.910                         | >333    | 146.387       |
| CAP45.2.00.G3      | C       | 0.029                             | 0.006         | 15.920                         | 0.193   | 0.039         |
| CAP210.2.00.E8     | C       | 0.173                             | 3.241         | 78.371                         | 1.153   | 21.608        |
| HIV-001428-2.42    | C       | 0.250                             | 0.027         | 28.984                         | 1.667   | 0.179         |
| HIV-0013095-2.11   | C       | 0.030                             | 0.170         | 7.069                          | 0.2     | 1.132         |
| HIV-16055-2.3      | C       | 0.06                              | 0.110         | 8.758                          | 0.4     | 0.734         |
| HIV-16845-2.22     | C       | >50                               | 18.415        | 31.308                         | >333    | 122.767       |
| Median             |         | 0.221                             | 1.362         | 18.915                         | 1.473   | 9.079         |
| Mean               |         | 1.969                             | 4.649         | 29.936                         | 13.127  | 30.996        |
| STD                |         | 3.261                             | 7.622         | 28.166                         | 21.740  | 50.812        |
| Ce1086_B2          | C (T/F) | >50                               | 4.069         | 4.462                          | >333    | 27.126        |
| Ce0393_C3          | C (T/F) | 0.055                             | 0.084         | 2.152                          | 0.367   | 0.561         |
| Ce1176_A3          | C (T/F) | 0.044                             | 0.117         | 87.151                         | 0.293   | 0.779         |
| Ce2010_F5          | C (T/F) | >50                               | >50           | >100                           | >333    | 333.000       |
| Ce0682_E4          | C (T/F) | 0.698                             | 1.507         | 29.311                         | 4.653   | 10.045        |
| Ce1172_H1          | C (T/F) | 0.206                             | 0.530         | 74.695                         | 1.373   | 3.535         |
| Ce2060_G9          | C (T/F) | 0.172                             | 0.297         | 17.488                         | 1.147   | 1.983         |
| Ce703010054_2A2    | C (T/F) | 0.103                             | 0.089         | 3.355                          | 0.687   | 0.594         |
| BF1266.431a        | C (T/F) | 0.088                             | 0.192         | 5.441                          | 0.587   | 1.283         |
| 246F_C1G           | C (T/F) | >50                               | 3.500         | 8.549                          | >333    | 23.333        |
| 249M_B10           | C (T/F) | 0.290                             | 0.508         | 2.674                          | 1.933   | 3.384         |
| ZM247v1(Rev-)      | C (T/F) | 0.323                             | 0.565         | 8.042                          | 2.153   | 3.765         |
| 7030102001E5(Rev-) | C (T/F) | >50                               | 29.579        | 20.305                         | >333    | 197.193       |
| 1394C9G1(Rev-)     | C (T/F) | 0.114                             | 0.155         | 12.912                         | 0.760   | 1.036         |
| Ce704809221_1B3    | C (T/F) | 0.137                             | 1.233         | 69.147                         | 0.913   | 8.218         |
| Median             |         | 0.137                             | 0.519         | 10.731                         | 0.913   | 3.535         |
| Mean               |         | 0.203                             | 3.030         | 24.692                         | 1.352   | 41.056        |
| STD                |         | 0.203                             | 3.030         | 24.692                         | 1.352   | 41.056        |
| CNE19              | BC      | 0.146                             | 0.245         | 17.066                         | 0.973   | 1.630         |
| CNE20              | BC      | 0.278                             | 0.637         | 8.431                          | 1.853   | 4.246         |
| CNE21              | BC      | 0.094                             | 0.392         | 5.283                          | 0.627   | 2.611         |
| CNE17              | BC      | 0.484                             | 1.171         | 29.677                         | 3.227   | 7.810         |
| CNE30              | BC      | >50                               | 41.902        | 39.067                         | >333    | 279.345       |
| CNE52              | BC      | 0.081                             | 0.821         | 100.000                        | 0.540   | 5.473         |
| CNE53              | BC      | 0.60                              | 3.285         | 60.248                         | 3.967   | 21.899        |
| CNE58              | BC      | 0.122                             | 0.732         | 51.858                         | 0.813   | 4.880         |
| Median             |         | 0.146                             | 0.776         | 34.372                         | 0.973   | 5.176         |
| Mean               |         | 0.257                             | 6.148         | 38.954                         | 1.714   | 40.987        |
| STD                |         | 0.206                             | 14.478        | 31.571                         | 1.372   | 96.522        |
| MS208.A1           | A       | 0.014                             | 0.409         | 1.099                          | 0.093   | 2.728         |
| Q23.17             | A       | 0.082                             | 0.052         | 95.241                         | 0.547   | 0.347         |
| Q461.e2            | A       | 8.725                             | 5.678         | 21.460                         | 58.167  | 37.854        |
| Q769.d22           | A       | 0.068                             | 0.099         | 28.769                         | 0.453   | 0.661         |
| Q259.d2.17         | A       | 1.379                             | 1.247         | 48.616                         | 9.193   | 8.314         |
| Q842.d12           | A       | 0.081                             | 0.215         | >100                           | 0.540   | 1.434         |
| Q330.v4.c3         | A       | 0.076                             | 0.159         | 8.747                          | 0.507   | 1.059         |
| Q260.v5.c36        | A       | 9.0                               | 10.948        | 97.906                         | 59.953  | 72.986        |
| Median             |         | 0.1                               | 0.312         | 28.769                         | 0.543   | 2.081         |
| Mean               |         | 2.427                             | 2.351         | 43.120                         | 16.182  | 15.673        |
| STD                |         | 3.996                             | 3.959         | 39.519                         | 26.642  | 26.390        |

IC80s continued:

|                  |                |        |        |         |         |         |
|------------------|----------------|--------|--------|---------|---------|---------|
| 191955_A11       | A (T/F)        | 0.154  | 0.069  | 0.236   | 1.027   | 0.459   |
| 191084_B7-19     | A (T/F)        | 0.202  | 0.346  | 26.672  | 1.347   | 2.308   |
| 9004SS_A3_4      | A (T/F)        | 0.251  | 0.484  | 24.314  | 1.673   | 3.227   |
| Median           |                | 0.202  | 0.346  | 24.314  | 1.347   | 2.308   |
| Mean             |                | 0.202  | 0.300  | 17.074  | 1.349   | 1.998   |
| STD              |                | 0.049  | 0.211  | 14.630  | 0.323   | 1.410   |
| T257-31          | CRF02_AG       | 0.124  | 0.353  | 68.083  | 0.827   | 2.353   |
| 928-28           | CRF02_AG       | 0.450  | 1.587  | 59.885  | 3.000   | 10.577  |
| 263-8            | CRF02_AG       | 1.050  | 1.784  | 44.140  | 7.000   | 11.894  |
| T250-4           | CRF02_AG       | 0.014  | 0.005  | 44.660  | 0.093   | 0.034   |
| T251-18          | CRF02_AG       | >50    | >50    | 94.866  | >333    | >333    |
| T278-50          | CRF02_AG       | 3.192  | 5.504  | 43.820  | 21.280  | 36.695  |
| T255-34          | CRF02_AG       | 0.134  | 0.364  | 27.550  | 0.893   | 2.426   |
| 211-9            | CRF02_AG       | 0.243  | 0.834  | 94.925  | 1.620   | 5.563   |
| 235-47           | CRF02_AG       | 1.201  | 1.882  | 8.140   | 8.007   | 12.543  |
| Median           |                | 0.347  | 1.211  | 44.660  | 2.310   | 8.070   |
| Mean             |                | 0.801  | 1.539  | 54.008  | 5.340   | 10.261  |
| STD              |                | 1.062  | 1.754  | 28.872  | 7.081   | 11.694  |
| 620345.c01       | CRF01_AE       | >50    | 14.409 | 33.074  | >333    | 96.062  |
| C1080.c03        | CRF01_AE       | 0.013  | 0.024  | 82.338  | 0.087   | 0.162   |
| R2184.c04        | CRF01_AE       | 1.237  | 3.136  | 21.270  | 8.247   | 20.908  |
| R1166.c01        | CRF01_AE       | 2.876  | 4.213  | 27.921  | 19.173  | 28.090  |
| R3265.c06        | CRF01_AE       | 0.535  | 1.408  | 22.063  | 3.567   | 9.384   |
| C2101.c01        | CRF01_AE       | 0.099  | 0.191  | 10.347  | 0.660   | 1.272   |
| C3347.c11        | CRF01_AE       | 0.113  | 1.065  | 13.964  | 0.753   | 7.098   |
| C4118.c09        | CRF01_AE       | 0.200  | 0.262  | 3.051   | 1.333   | 1.748   |
| CNE5             | CRF01_AE       | 0.051  | 0.061  | 3.470   | 0.340   | 0.409   |
| BJOX009000.02.4  | CRF01_AE       | 8.211  | 11.028 | 35.617  | 54.740  | 73.518  |
| Median           |                | 0.200  | 1.236  | 21.667  | 1.333   | 8.241   |
| Mean             |                | 1.482  | 3.580  | 25.312  | 9.878   | 23.865  |
| STD              |                | 2.688  | 5.076  | 23.040  | 17.922  | 33.841  |
| BJOX015000.11.5  | CRF01_AE (T/F) | 1.489  | 5.628  | 45.477  | 9.927   | 37.518  |
| BJOX010000.06.2  | CRF01_AE (T/F) | 0.740  | 2.804  | 19.761  | 4.933   | 18.695  |
| BJOX025000.01.1  | CRF01_AE (T/F) | 0.335  | 2.721  | 18.749  | 2.233   | 18.140  |
| BJOX028000.10.3  | CRF01_AE (T/F) | 21.500 | 4.000  | 17.776  | 143.333 | 26.667  |
| Median           |                | 1.115  | 3.402  | 19.255  | 7.430   | 22.681  |
| Mean             |                | 6.016  | 3.788  | 25.441  | 40.107  | 25.255  |
| STD              |                | 10.334 | 1.358  | 13.382  | 68.892  | 9.056   |
| X1193_c1         | G              | 0.304  | 1.745  | 16.344  | 2.027   | 11.630  |
| P0402_c2_11      | G              | 2.367  | 1.821  | 19.745  | 15.780  | 12.140  |
| X1254_c3         | G              | 0.304  | 1.557  | 17.921  | 2.027   | 10.381  |
| X2088_c9         | G              | >50    | 30.361 | 55.550  | >333    | 202.403 |
| X2131_C1_B5      | G              | 0.286  | 2.383  | 19.084  | 1.907   | 15.888  |
| P1981_C5_3       | G              | 2.512  | 5.532  | 71.099  | 16.747  | 36.880  |
| X1632_S2_B10     | G              | 0.934  | 5.046  | 96.596  | 6.227   | 33.641  |
| Median           |                | 0.619  | 2.383  | 19.745  | 4.127   | 15.888  |
| Mean             |                | 1.118  | 6.921  | 42.334  | 7.452   | 46.138  |
| STD              |                | 1.054  | 10.464 | 32.323  | 7.027   | 69.763  |
| 3016.v5.c45      | D              | >50    | 1.571  | 2.193   | >333    | 10.476  |
| A07412M1.vrc12   | D              | 7.963  | 6.715  | 49.448  | 53.087  | 44.768  |
| 231965.c01       | D              | 47.969 | 12.029 | 49.438  | 319.793 | 80.190  |
| 231966.c02       | D              | 0.257  | 0.708  | 14.785  | 1.713   | 4.723   |
| Median           |                | 7.963  | 4.143  | 32.112  | 53.087  | 27.622  |
| Mean             |                | 18.730 | 5.256  | 28.966  | 124.864 | 35.039  |
| STD              |                | 25.613 | 5.236  | 24.197  | 170.756 | 34.908  |
| 191821_E6_1      | D (T/F)        | >50    | 0.976  | 1.298   | >333    | 6.510   |
| Median(D+D(T/F)) |                | 7.963  | 1.571  | 14.785  | 53.087  | 10.476  |
| Mean(D+D(T/F))   |                | 18.730 | 4.400  | 23.432  | 124.864 | 29.333  |
| STD(D+D(T/F))    |                | 25.613 | 4.922  | 24.336  | 170.756 | 32.813  |
| 3817.v2.c59      | CD             | 0.062  | 0.030  | 31.940  | 0.413   | 0.202   |
| 6480.v4.c25      | CD             | >50    | 8.097  | 10.890  | >333    | 53.983  |
| 6952.v1.c20      | CD             | >50    | 11.544 | 19.843  | >333    | 76.958  |
| 6811.v7.c18      | CD             | >50    | 24.897 | 50.284  | >333    | 165.983 |
| 89-F1_2_25       | CD             | 10.103 | 2.209  | 2.289   | 67.353  | 14.728  |
| Median           |                | 5.083  | 8.097  | 19.843  | 33.883  | 53.983  |
| Mean             |                | 5.083  | 9.356  | 23.049  | 33.883  | 62.371  |
| STD              |                | 7.100  | 9.823  | 18.774  | 47.334  | 65.486  |
| 3301.v1.c24      | AC             | 0.756  | 2.568  | 24.002  | 5.040   | 17.120  |
| 6041.v3.c23      | AC             | 3.639  | 3.224  | 13.488  | 24.260  | 21.490  |
| 6540.v4.c1       | AC             | 0.253  | 0.694  | 55.967  | 1.687   | 4.627   |
| 6545.v4.c1       | AC             | 0.351  | 1.082  | 25.819  | 2.340   | 7.210   |
| Median           |                | 0.554  | 1.825  | 24.911  | 3.690   | 12.165  |
| Mean             |                | 1.250  | 1.892  | 29.819  | 8.332   | 12.612  |
| STD              |                | 1.608  | 1.200  | 18.260  | 10.718  | 8.002   |
| 0815.v3.c3       | ACD            | >50    | 7.406  | 7.363   | >333    | 49.373  |
| 3103.v3.c10      | ACD            | >50    | 50.000 | 100.000 | >333    | >333    |
| Median           |                | >50    | 28.703 | 53.682  | >333    | 49.373  |
| Mean             |                | >50    | 28.703 | 53.682  | >333    | 49.373  |
| STD              |                | >50    | 30.119 | 65.504  | >333    | 49.373  |

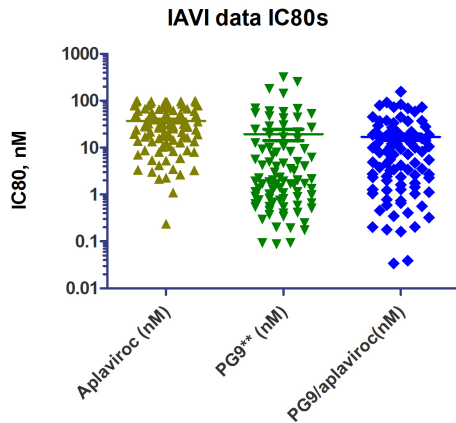

**Figure 5.** Graphical representation of the IC80s for all samples. PG9 IC80s>333nM are omitted for clarity.

**Statistical analysis for all samples with PG9 IC80<50 ug/ml.**

The following Mean and Median IC80s were calculated by GraphPad Prism analysis:

PG9 Median IC80 = 1.98nM, Mean IC80 = 19.46nM

PG9/aplaviroc Median IC80 = 7.51nM, Mean IC80 = 17.00nM

Aplaviroc Median IC80 =27.55nM, Mean IC80 =37.22nM.

Mann Whitney test has shown that in this set of samples there is statistically significant difference between Median IC80 values of PG9 and PG9/aplaviroc (P value 0.0161).

Mann Whitney test has shown that in this set of samples there is statistically significant difference between Median IC80 values of Aplaviroc and PG9/aplaviroc (P value <0.0001).

Pseudoviruses where PG9-aplaviroc has improved IC80 relative to wildtype PG9. Pseudoviruses neutralized by PG9 with IC80>50 µg/ml (>333nM) are grouped separately.

Improved IC80s

| Virus ID          | Clade*         | IC80 Titer in TZM-bl cells, µg/ml |               | IC80 Titer in TZM-bl cells, nM |               |               |
|-------------------|----------------|-----------------------------------|---------------|--------------------------------|---------------|---------------|
|                   |                | PG9*                              | PG9/aplaviroc | Aplaviroc (nM)                 | PG9*          | PG9/aplaviroc |
| 1056_10_TA11_1826 | B (T/F)        | 38.259                            | 23.408        | 66.049                         | 255.06        | 156.056       |
| Du172.17          | C              | 1.604                             | 2.746         | 62.373                         | 10.693        | 18.308        |
| Du422.1           | C              | 10.398                            | 2.824         | 52.130                         | 69.32         | 18.824        |
| ZM197M.PB7        | C              | 4.517                             | 2.214         | 13.654                         | 30.113        | 14.762        |
| ZM233M.PB6        | C              | 0.026                             | 0.030         | 3.294                          | 0.173         | 0.202         |
| ZM249M.PL1        | C              | 1.410                             | 0.409         | 4.246                          | 9.4           | 2.729         |
| HIV-001428-2.42   | C              | 0.250                             | 0.027         | 28.984                         | 1.667         | 0.179         |
| Ce703010054_2A2   | C (T/F)        | 0.103                             | 0.089         | 3.355                          | 0.687         | 0.594         |
| Q23.17            | A              | 0.082                             | 0.052         | 95.241                         | 0.547         | 0.347         |
| Q461.e2           | A              | 8.725                             | 5.678         | 21.460                         | 58.167        | 37.854        |
| Q769.d22          | A              | 0.068                             | 0.099         | 28.769                         | 0.453         | 0.661         |
| 191955_A11        | A (T/F)        | 0.154                             | 0.069         | 0.236                          | 1.027         | 0.459         |
| T250-4            | CRF02_AG       | 0.014                             | 0.005         | 44.660                         | 0.093         | 0.034         |
| C2101.c01         | CRF01_AE       | 0.099                             | 0.191         | 10.347                         | 0.660         | 1.272         |
| 3817.v2.c59       | CD             | 0.062                             | 0.030         | 31.940                         | 0.413         | 0.202         |
| A07412M1.vrc12    | D              | 7.963                             | 6.715         | 49.448                         | 53.087        | 44.768        |
| 6041.v3.c23       | AC             | 3.639                             | 3.224         | 13.488                         | 24.260        | 21.490        |
| 231965.c01        | D              | 47.969                            | 12.029        | 49.438                         | 319.793       | 80.190        |
| BJOX028000.10.3   | CRF01_AE (T/F) | 21.500                            | 4.000         | 17.776                         | 143.333       | 26.667        |
| CAAN5342.A2       | B              | 26.992                            | 13.870        | 30.832                         | 179.947       | 92.465        |
| ZM109F.PB4        | C              | 6.689                             | 2.457         | 10.570                         | 44.593        | 16.381        |
| P0402_c2_11       | G              | 2.367                             | 1.821         | 19.745                         | 15.780        | 12.140        |
| 89-F1_2_25        | CD             | 10.103                            | 2.209         | 2.289                          | 67.353        | 14.728        |
| <b>Median</b>     |                | <b>2.367</b>                      | <b>2.209</b>  | <b>21.460</b>                  | <b>15.780</b> | <b>14.728</b> |
| <b>Mean</b>       |                | <b>8.391</b>                      | <b>3.661</b>  | <b>28.710</b>                  | <b>55.940</b> | <b>24.405</b> |
| <b>STD</b>        |                | <b>13.099</b>                     | <b>5.702</b>  | <b>24.684</b>                  | <b>87.324</b> | <b>38.016</b> |

Average improvement of 2.29 fold relative to PG9  
 Average decrease of potency relative to aplaviroc : 1.18 fold

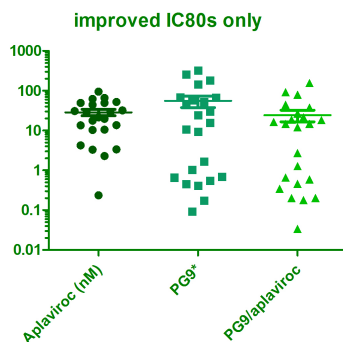

Figure 6. Graphical representation of the improved IC80s. Pseudoviruses where PG9 has IC80>50 µg/ml are grouped separately.

**Statistical analysis for all samples with improved PG9/aplaviroc IC80s relative to PG9. Sample set where PG9 has IC80> 50ug/ml is analyzed separately.**

The following Mean and Median IC80s were calculated by GraphPad Prism analysis:

PG9 Median IC80 = 15.78nM, Mean IC80 = 55.94nM

PG9/aplaviroc Median IC80 = 14.73nM, Mean IC80 = 24.4nM

Aplaviroc Median IC80 =21.46nM, Mean IC80 =28.71nM.

Mann Whitney test has shown that in this set of samples there is no statistically significant difference between Median IC80 values of PG9 and PG9/aplaviroc (P value 0.3448).

Mann Whitney test has shown that in this set of samples there is no statistically significant difference between Median IC80 values of APlaviroc and PG9/aplaviroc (P value 0.0826).

Pseudoviruses neutralized by PG9 with IC80>50 µg/ml (>333nM):

| Virus ID           | Clade*   | IC80 Titer in T2M-bl cells, µg/ml |               | IC80 Titer in T2M-bl cells, nM |      |                |
|--------------------|----------|-----------------------------------|---------------|--------------------------------|------|----------------|
|                    |          | PG9*                              | PG9/aplaviroc | Aplaviroc (nM)                 | PG9* | PG9/aplaviroc  |
| WEAU_d15_410_5017  | B (T/F)  | >50                               | 19.772        | >100                           | >333 | 131.815        |
| HIV-16845-2.22     | C        | >50                               | 18.415        | 31.308                         | >333 | 122.767        |
| 620345.c01         | CRF01_AE | >50                               | 14.409        | 33.074                         | >333 | 96.062         |
| 0815.v3.c3         | ACD      | >50                               | 7.406         | 7.363                          | >333 | 49.373         |
| 6480.v4.c25        | CD       | >50                               | 8.097         | 10.890                         | >333 | 53.983         |
| 6952.v1.c20        | CD       | >50                               | 11.544        | 19.843                         | >333 | 76.958         |
| 6811.v7.c18        | CD       | >50                               | 24.897        | 50.284                         | >333 | 165.983        |
| X2088_c9           | G        | >50                               | 30.361        | 55.550                         | >333 | 202.403        |
| 3016.v5.c45        | D        | >50                               | 1.571         | 2.193                          | >333 | 10.476         |
| 191821_E6_1        | D (T/F)  | >50                               | 0.976         | 1.298                          | >333 | 6.510          |
| 246F_C1G           | C (T/F)  | >50                               | 3.500         | 8.549                          | >333 | 23.333         |
| 7030102001E5(Rev-) | C (T/F)  | >50                               | 29.579        | 20.305                         | >333 | 197.193        |
| CNE30              | BC       | >50                               | 41.902        | 39.067                         | >333 | 279.345        |
| Ce1086_B2          | C (T/F)  | >50                               | 4.069         | 4.462                          | >333 | 27.126         |
| ZM214M.PL15        | C        | >50                               | 18.933        | 40.579                         | >333 | 126.218        |
| PVO.4              | B        | >50                               | 8.239         | 11.173                         | >333 | 54.930         |
| TRO.11             | B        | >50                               | 35.584        | 100.000                        | >333 | 237.227        |
| RHPA4259.7         | B        | >50                               | 7.092         | 19.358                         | >333 | 47.277         |
| THRO4156.18        | B        | >50                               | 20.071        | 61.850                         | >333 | 133.804        |
| 1054_07_TC4_1499   | B (T/F)  | >50                               | 36.094        | 57.473                         | >333 | 240.628        |
| 6244_13_B5_4576    | B (T/F)  | >50                               | 28.640        | 46.026                         | >333 | 190.935        |
| 62357_14_D3_4589   | B (T/F)  | >50                               | 17.254        | 16.826                         | >333 | 115.025        |
| <b>Median</b>      |          |                                   | <b>17.834</b> | <b>20.305</b>                  |      | <b>118.896</b> |
| <b>Mean</b>        |          |                                   | <b>17.655</b> | <b>30.356</b>                  |      | <b>117.699</b> |
| <b>STD</b>         |          |                                   | <b>12.160</b> | <b>25.118</b>                  |      | <b>81.066</b>  |

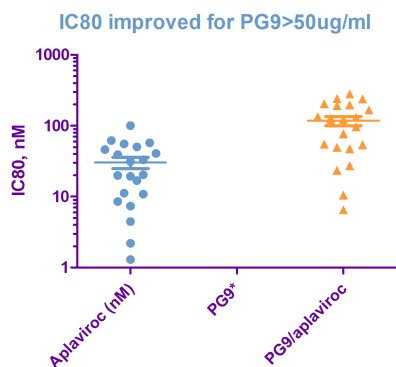

Figure 7. Graphical representation of the IC80s of aplaviroc and PG9-aplaviroc in the panel of pseudoviruses poorly neutralized by PG9 (IC80>50 µg/ml).

**Statistical analysis for all samples where PG9 has IC80> 50ug/ml.**

The following Mean and Median IC80s were calculated by GraphPad Prism analysis:

PG9/aplaviroc Median IC80 = 118.9nM, Mean IC80 = 117.7nM

Aplaviroc Median IC80 =20.31nM, Mean IC80 =30.36nM.

Mann Whitney test has shown that in this set of samples there is statistically significant difference between Median IC80 values of Aplaviroc and PG9/aplaviroc (P value 0.0001).

Pseudoviruses neutralized by both PG9 and PG9-aplaviroc with IC80>50 µg/ml (>333nM):

| Virus ID    | Clade*   | IC80 Titer in TZM-bl cells, µg/ml |               | IC80 Titer in TZM-bl cells, nM |      |               |
|-------------|----------|-----------------------------------|---------------|--------------------------------|------|---------------|
|             |          | PG9*                              | PG9/aplaviroc | Aplaviroc (nM)                 | PG9* | PG9/aplaviroc |
| 3103.v3.c10 | ACD      | >50                               | >50           | >100                           | >333 | >333          |
| T251-18     | CRF02_AG | >50                               | >50           | 94.866                         | >333 | >333          |
| Ce2010_F5   | C (T/F)  | >50                               | >50           | >100                           | >333 | >333          |
| QH0692.42   | B        | >50                               | >50           | 98.769                         | >333 | >333          |

Pseudoviruses where PG9-aplaviroc shows decreased potency (IC80) relative to wildtype PG9:

Decrease of potency of PG9/apl relative to PG9, IC80s

| Virus ID          | Clade*         | IC80 Titer in TZM-bl cells, µg/ml |               | IC80 Titer in TZM-bl cells, nM |        |               |
|-------------------|----------------|-----------------------------------|---------------|--------------------------------|--------|---------------|
|                   |                | PG9*                              | PG9/aplaviroc | Aplaviroc (nM)                 | PG9*   | PG9/aplaviroc |
| 6535.3            | B              | 0.627                             | 1.490         | 12.517                         | 4.18   | 9.933         |
| SC422661.8        | B              | 7.054                             | 12.585        | 79.320                         | 47.027 | 83.899        |
| AC10.0.29         | B              | 0.845                             | 1.810         | 87.686                         | 5.633  | 12.067        |
| REJO4541.67       | B              | 0.163                             | 0.185         | 82.676                         | 1.087  | 1.233         |
| TRJO4551.58       | B              | 4.061                             | 8.795         | >100                           | 27.073 | 58.633        |
| WITO4160.33       | B              | 0.037                             | 0.049         | 78.852                         | 0.247  | 0.325         |
| 1006_11_C3_1601   | B (T/F)        | 1.906                             | 2.119         | 32.098                         | 12.707 | 14.129        |
| 1012_11_TC21_3257 | B (T/F)        | 0.605                             | 4.402         | 98.066                         | 4.034  | 29.345        |
| 6240_08_TA5_4622  | B (T/F)        | 6.333                             | 10.408        | 67.658                         | 42.22  | 69.384        |
| SC05_8C11_2344    | B (T/F)        | 4.283                             | 6.784         | 32.815                         | 28.553 | 45.227        |
| Du156.12          | C              | 0.190                             | 0.342         | 93.800                         | 1.267  | 2.280         |
| ZM53M.PB12        | C              | 0.221                             | 0.509         | 6.009                          | 1.473  | 3.395         |
| CAP210.2.00.E8    | C              | 0.173                             | 3.241         | 78.371                         | 1.153  | 21.608        |
| HIV-0013095-2.11  | C              | 0.030                             | 0.170         | 7.069                          | 0.2    | 1.132         |
| HIV-16055-2.3     | C              | 0.06                              | 0.110         | 8.758                          | 0.4    | 0.734         |
| Ce0393_C3         | C (T/F)        | 0.055                             | 0.084         | 2.152                          | 0.367  | 0.561         |
| Ce1176_A3         | C (T/F)        | 0.044                             | 0.117         | 87.151                         | 0.293  | 0.779         |
| Ce0682_E4         | C (T/F)        | 0.698                             | 1.507         | 29.311                         | 4.653  | 10.045        |
| Ce1172_H1         | C (T/F)        | 0.206                             | 0.530         | 74.695                         | 1.373  | 3.535         |
| Ce2060_G9         | C (T/F)        | 0.172                             | 0.297         | 17.488                         | 1.147  | 1.983         |
| 249M B10          | C (T/F)        | 0.290                             | 0.508         | 2.674                          | 1.933  | 3.384         |
| ZM247v1(Rev-)     | C (T/F)        | 0.323                             | 0.565         | 8.042                          | 2.153  | 3.765         |
| 1394C9G1(Rev-)    | C (T/F)        | 0.114                             | 0.155         | 12.912                         | 0.760  | 1.036         |
| Ce704809221_1B3   | C (T/F)        | 0.137                             | 1.233         | 69.147                         | 0.913  | 8.218         |
| CNE19             | BC             | 0.146                             | 0.245         | 17.066                         | 0.973  | 1.630         |
| CNE20             | BC             | 0.278                             | 0.637         | 8.431                          | 1.853  | 4.246         |
| CNE21             | BC             | 0.094                             | 0.392         | 5.283                          | 0.627  | 2.611         |
| CNE17             | BC             | 0.484                             | 1.171         | 29.677                         | 3.227  | 7.810         |
| CNE52             | BC             | 0.081                             | 0.821         | >100                           | 0.540  | 5.473         |
| CNE53             | BC             | 0.60                              | 3.285         | 60.248                         | 3.967  | 21.899        |
| CNE58             | BC             | 0.122                             | 0.732         | 51.858                         | 0.813  | 4.880         |
| MS208.A1          | A              | 0.014                             | 0.409         | 1.099                          | 0.093  | 2.728         |
| Q259.d2.17        | A              | 1.379                             | 1.247         | 48.616                         | 9.193  | 8.314         |
| Q842.d12          | A              | 0.081                             | 0.215         | >100                           | 0.540  | 1.434         |
| 0330.v4.c3        | A              | 0.076                             | 0.159         | 8.747                          | 0.507  | 1.059         |
| 0260.v5.c36       | A              | 9.0                               | 10.948        | 97.906                         | 59.953 | 72.986        |
| 191084 B7-19      | A (T/F)        | 0.202                             | 0.346         | 26.672                         | 1.347  | 2.308         |
| 9004SS_A3_4       | A (T/F)        | 0.251                             | 0.484         | 24.314                         | 1.673  | 3.227         |
| T257-31           | CRF02_AG       | 0.124                             | 0.353         | 68.083                         | 0.827  | 2.353         |
| 928-28            | CRF02_AG       | 0.450                             | 1.587         | 59.885                         | 3.000  | 10.577        |
| 263-8             | CRF02_AG       | 1.050                             | 1.784         | 44.140                         | 7.000  | 11.894        |
| T278-50           | CRF02_AG       | 3.192                             | 5.504         | 43.820                         | 21.280 | 36.695        |
| T255-34           | CRF02_AG       | 0.134                             | 0.364         | 27.550                         | 0.893  | 2.426         |
| 211-9             | CRF02_AG       | 0.243                             | 0.834         | 94.925                         | 1.620  | 5.563         |
| 235-47            | CRF02_AG       | 1.201                             | 1.882         | 8.140                          | 8.007  | 12.543        |
| C1080.c03         | CRF01_AE       | 0.013                             | 0.024         | 82.338                         | 0.087  | 0.162         |
| R2184.c04         | CRF01_AE       | 1.237                             | 3.136         | 21.270                         | 8.247  | 20.908        |
| R1166.c01         | CRF01_AE       | 2.876                             | 4.213         | 27.921                         | 19.173 | 28.090        |
| R3265.c06         | CRF01_AE       | 0.535                             | 1.408         | 22.063                         | 3.567  | 9.384         |
| C3347.c11         | CRF01_AE       | 0.113                             | 1.065         | 13.964                         | 0.753  | 7.098         |
| C4118.c09         | CRF01_AE       | 0.200                             | 0.262         | 3.051                          | 1.333  | 1.748         |
| CNE5              | CRF01_AE       | 0.051                             | 0.061         | 3.470                          | 0.340  | 0.409         |
| BJOX009000.02.4   | CRF01_AE       | 8.211                             | 11.028        | 35.617                         | 54.740 | 73.518        |
| BJOX015000.11.5   | CRF01_AE (T/F) | 1.489                             | 5.628         | 45.477                         | 9.927  | 37.518        |
| BJOX010000.06.2   | CRF01_AE (T/F) | 0.740                             | 2.804         | 19.761                         | 4.933  | 18.695        |
| BJOX025000.01.1   | CRF01_AE (T/F) | 0.335                             | 2.721         | 18.749                         | 2.233  | 18.140        |
| X1193_c1          | G              | 0.304                             | 1.745         | 16.344                         | 2.027  | 11.630        |
| X1254_c3          | G              | 0.304                             | 1.557         | 17.921                         | 2.027  | 10.381        |
| X2131_C1_B5       | G              | 0.286                             | 2.383         | 19.084                         | 1.907  | 15.888        |
| P1981_C5_3        | G              | 2.512                             | 5.532         | 71.099                         | 16.747 | 36.880        |

|              |    |       |       |        |        |        |
|--------------|----|-------|-------|--------|--------|--------|
| X1632_S2_B10 | G  | 0.934 | 5.046 | 96.596 | 6.227  | 33.641 |
| 231966.c02   | D  | 0.257 | 0.708 | 14.785 | 1.713  | 4.723  |
| 3301.v1.c24  | AC | 0.756 | 2.568 | 24.002 | 5.040  | 17.120 |
| 6540.v4.c1   | AC | 0.253 | 0.694 | 55.967 | 1.687  | 4.627  |
| 6545.v4.c1   | AC | 0.351 | 1.082 | 25.819 | 2.340  | 7.210  |
| Median       |    | 0.286 | 1.082 | 27.736 | 1.907  | 7.210  |
| Mean         |    | 1.070 | 2.232 | 39.210 | 7.136  | 14.878 |
| STD          |    | 1.943 | 2.967 | 30.891 | 12.953 | 19.777 |

Average decrease of potency of PG9/apl relative to PG9: 2.08 fold  
Average improvement of potency for PG9/apl relative to aplaviroc: 2.64 fold

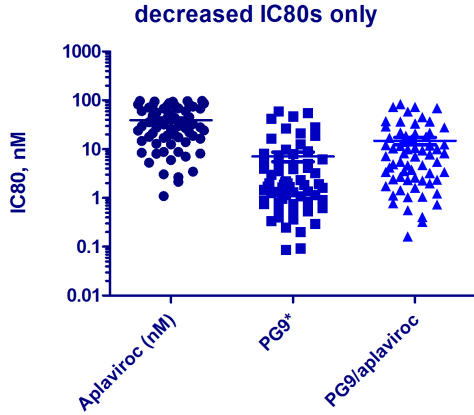

**Figure 8.** Graphical representation of IC80s in the pseudovirus panel where PG9-aplaviroc has decreased potency relative to PG9.

### Statistical analysis for all samples with decreased PG9/aplaviroc potency relative to PG9.

The following Mean and Median IC80s were calculated by GraphPad Prism analysis:

PG9 Median IC80 = 1.91nM, Mean IC80 = 7.14nM

PG9/aplaviroc Median IC80 = 7.21nM, Mean IC80 = 14.88nM

Aplaviroc Median IC80 =27.74nM, Mean IC80 =39.21nM.

Mann Whitney test has shown that in this set of samples there is statistically significant difference between Median IC80 values of PG9 and PG9/aplaviroc (P value 0.0001).

Mann Whitney test has shown that in this set of samples there is statistically significant difference between Median IC80 values of Aplaviroc and PG9/aplaviroc (P value <0.0001).

## **6. PG9 and PG9-aplaviroc MPI full summary.**

Special Note: MPIs >99.5% were rounded up by the software analysis program to 100%.



| Virus ID           | Clade* | MPI       |               |
|--------------------|--------|-----------|---------------|
|                    |        | PG9       | PG9/Aplaviroc |
| 6535.3             | B      | 96        | 100           |
| QH0692.42          | B      | 20        | 78            |
| SC422661.8         | B      | 86        | 96            |
| PVO.4              | B      | 78        | 100           |
| TRO.11             | B      | 55        | 83            |
| AC10.0.29          | B      | 90        | 99            |
| RHPA4259.7         | B      | 63        | 100           |
| THRO4156.18        | B      | 61        | 93            |
| REJO4541.67        | B      | 96        | 99            |
| TRJO4551.58        | B      | 95        | 96            |
| WITO4160.33        | B      | 100       | 100           |
| CAAN5342.A2        | B      | 87        | 97            |
| <b>Average</b>     |        | <b>77</b> | <b>95</b>     |
| WEAU_d15_410_5017  | B(T/F) | 64        | 84            |
| 1006_11_C3_1601    | B(T/F) | 95        | 100           |
| 1054_07_TC4_1499   | B(T/F) | 0         | 83            |
| 1056_10_TA11_1826  | B(T/F) | 83        | 92            |
| 1012_11_TC21_3257  | B(T/F) | 99        | 99            |
| 6240_08_TA5_4622   | B(T/F) | 97        | 98            |
| 6244_13_B5_4576    | B(T/F) | 27        | 89            |
| 62357_14_D3_4589   | B(T/F) | 13        | 97            |
| SC05_8C11_2344     | B(T/F) | 93        | 100           |
| <b>Average</b>     |        | <b>63</b> | <b>94</b>     |
| Du156.12           | C      | 100       | 100           |
| Du172.17           | C      | 99        | 100           |
| Du422.1            | C      | 87        | 98            |
| ZM197M.PB7         | C      | 97        | 100           |
| ZM214M.PL15        | C      | 0         | 94            |
| ZM233M.PB6         | C      | 100       | 100           |
| ZM249M.PL1         | C      | 95        | 100           |
| ZM53M.PB12         | C      | 100       | 100           |
| ZM109F.PB4         | C      | 89        | 100           |
| ZM135M.PL10a       | C      | 69        | 93            |
| CAP45.2.00.G3      | C      | 100       | 100           |
| CAP210.2.00.E8     | C      | 98        | 100           |
| HIV-001428-2.42    | C      | 100       | 100           |
| HIV-0013095-2.11   | C      | 100       | 100           |
| HIV-16055-2.3      | C      | 100       | 100           |
| HIV-16845-2.22     | C      | 79        | 96            |
| <b>Average</b>     |        | <b>88</b> | <b>99</b>     |
| Ce1086_B2          | C(T/F) | 0         | 100           |
| Ce0393_C3          | C(T/F) | 100       | 100           |
| Ce1176_A3          | C(T/F) | 100       | 100           |
| Ce2010_F5          | C(T/F) | 23        | 68            |
| Ce0682_E4          | C(T/F) | 100       | 100           |
| Ce1172_H1          | C(T/F) | 100       | 100           |
| Ce2060_G9          | C(T/F) | 100       | 100           |
| Ce703010054_2A2    | C(T/F) | 100       | 100           |
| BF1266.431a        | C(T/F) | 100       | 100           |
| 246F_C1G           | C(T/F) | 10        | 100           |
| 249M_B10           | C(T/F) | 97        | 100           |
| ZM247v1(Rev-)      | C(T/F) | 100       | 100           |
| 7030102001E5(Rev-) | C(T/F) | 5         | 92            |
| 1394C9G1(Rev-)     | C(T/F) | 100       | 100           |
| Ce704809221_1B3    | C(T/F) | 100       | 100           |
| <b>Average</b>     |        | <b>76</b> | <b>97</b>     |
| CNE19              | BC     | 99        | 100           |
| CNE20              | BC     | 100       | 100           |
| CNE21              | BC     | 99        | 100           |
| CNE17              | BC     | 100       | 100           |
| CNE30              | BC     | 16        | 81            |
| CNE52              | BC     | 100       | 100           |
| CNE53              | BC     | 100       | 99            |
| CNE58              | BC     | 100       | 100           |
| <b>Average</b>     |        | <b>89</b> | <b>98</b>     |
| MS208.A1           | A      | 98        | 100           |
| Q23.17             | A      | 100       | 100           |

MPI summary continued:

|                 |                |            |            |
|-----------------|----------------|------------|------------|
| Q461.e2         | A              | 91         | 100        |
| Q769.d22        | A              | 99         | 100        |
| Q259.d2.17      | A              | 90         | 99         |
| Q842.d12        | A              | 100        | 100        |
| 0330.v4.c3      | A              | 100        | 100        |
| 0260.v5.c36     | A              | 94         | 95         |
| <b>Average</b>  |                | <b>97</b>  | <b>99</b>  |
| 191955_A11      | A(T/F)         | 100        | 100        |
| 191084_B7-19    | A(T/F)         | 100        | 100        |
| 9004SS_A3_4     | A(T/F)         | 100        | 100        |
| <b>Average</b>  |                | <b>100</b> | <b>100</b> |
| T257-31         | CRF02_AG       | 100        | 100        |
| 928-28          | CRF02_AG       | 100        | 100        |
| 263-8           | CRF02_AG       | 99         | 100        |
| T250-4          | CRF02_AG       | 100        | 100        |
| T251-18         | CRF02_AG       | 42         | 70         |
| T278-50         | CRF02_AG       | 97         | 99         |
| T255-34         | CRF02_AG       | 97         | 100        |
| 211-9           | CRF02_AG       | 99         | 100        |
| 235-47          | CRF02_AG       | 97         | 100        |
| <b>Average</b>  |                | <b>92</b>  | <b>97</b>  |
| 620345.c01      | CRF01_AE       | 67         | 96         |
| C1080.c03       | CRF01_AE       | 100        | 100        |
| R2184.c04       | CRF01_AE       | 98         | 100        |
| R1166.c01       | CRF01_AE       | 98         | 98         |
| R3265.c06       | CRF01_AE       | 100        | 100        |
| C2101.c01       | CRF01_AE       | 99         | 100        |
| C3347.c11       | CRF01_AE       | 100        | 100        |
| C4118.c09       | CRF01_AE       | 100        | 100        |
| CNE5            | CRF01_AE       | 100        | 100        |
| BJOX009000.02.4 | CRF01_AE       | 96         | 97         |
| <b>Average</b>  |                | <b>96</b>  | <b>99</b>  |
| BJOX015000.11.5 | CRF01_AE (T/F) | 98         | 100        |
| BJOX010000.06.2 | CRF01_AE (T/F) | 97         | 99         |
| BJOX025000.01.1 | CRF01_AE (T/F) | 93         | 100        |
| BJOX028000.10.3 | CRF01_AE (T/F) | 84         | 99         |
| <b>Average</b>  |                | <b>93</b>  | <b>100</b> |
| X1193_c1        | G              | 100        | 100        |
| P0402_c2_11     | G              | 95         | 100        |
| X1254_c3        | G              | 98         | 100        |
| X2088_c9        | G              | 16         | 91         |
| X2131_C1_B5     | G              | 99         | 100        |
| P1981_C5_3      | G              | 95         | 97         |
| X1632_S2_B10    | G              | 94         | 95         |
|                 |                | <b>85</b>  | <b>98</b>  |
| 3016.v5.c45     | D              | 66         | 100        |
| A07412M1.vrc12  | D              | 90         | 99         |
| 231965.c01      | D              | 80         | 94         |
| 231966.c02      | D              | 100        | 100        |
|                 |                |            |            |
| 191821_E6_1     | D (T/F)        | 78         | 100        |
| <b>Average</b>  |                | <b>83</b>  | <b>99</b>  |
| 3817.v2.c59     | CD             | 97         | 100        |
| 6480.v4.c25     | CD             | 13         | 97         |
| 6952.v1.c20     | CD             | 35         | 96         |
| 6811.v7.c18     | CD             | 3          | 90         |
| 89-F1_2_25      | CD             | 88         | 100        |
| <b>Average</b>  |                | <b>47</b>  | <b>97</b>  |
| 3301.v1.c24     | AC             | 100        | 100        |
| 6041.v3.c23     | AC             | 94         | 100        |
| 6540.v4.c1      | AC             | 99         | 99         |
| 6545.v4.c1      | AC             | 98         | 100        |
| <b>Average</b>  |                | <b>98</b>  | <b>100</b> |
| 0815.v3.c3      | ACD            | 0          | 98         |
| 3103.v3.c10     | ACD            | 58         | 69         |
| <b>Average</b>  |                | <b>29</b>  | <b>84</b>  |
